# Supplementary material for: Do hospitals influence geographic variation in admission for preventable hospitalisation? A data linkage study in New South Wales, Australia
Source: PubMed Central journal article supplement (PMC6398792; doi:10.1136/bmjopen-2018-027639), 2019-02-22
Supplement: bmjopen-2018-027639.draft_revisions.pdf [file bmjopen-2018-027639.draft_revisions.pdf]

# BMJ Open

BMJ Open is committed to open peer review. As part of this commitment we make the peer review history of every article we publish publicly available.

When an article is published we post the peer reviewers' comments and the authors' responses online. We also post the versions of the paper that were used during peer review. These are the versions that the peer review comments apply to.

The versions of the paper that follow are the versions that were submitted during the peer review process. They are not the versions of record or the final published versions. They should not be cited or distributed as the published version of this manuscript.

BMJ Open is an open access journal and the full, final, typeset and author-corrected version of record of the manuscript is available on our site with no access controls, subscription charges or pay-per-view fees (<http://bmjopen.bmj.com>).

If you have any questions on BMJ Open's open peer review process please email [info.bmjopen@bmj.com](mailto:info.bmjopen@bmj.com)

# BMJ Open

## Exploring hospital variation in preventable hospitalisation in Australia

|                               |                                                                                                                                                                                                                                                                             |
|-------------------------------|-----------------------------------------------------------------------------------------------------------------------------------------------------------------------------------------------------------------------------------------------------------------------------|
| Journal:                      | <i>BMJ Open</i>                                                                                                                                                                                                                                                             |
| Manuscript ID                 | bmjopen-2018-027639                                                                                                                                                                                                                                                         |
| Article Type:                 | Research                                                                                                                                                                                                                                                                    |
| Date Submitted by the Author: | 01-Nov-2018                                                                                                                                                                                                                                                                 |
| Complete List of Authors:     | Falster, Michael; University of New South Wales, Centre for Big Data Research in Health<br>Leyland, Alastair; MRC/CSO Social and Public Health Sciences Unit, University of Glasgow,<br>Jorm, Louisa; University of New South Wales, Centre for Big Data Research in Health |
| Keywords:                     | PRIMARY CARE, Preventable hospitalisations, Ambulatory care sensitive conditions, Multilevel modelling                                                                                                                                                                      |
|                               |                                                                                                                                                                                                                                                                             |

SCHOLARONE™  
Manuscripts

## Title

Exploring hospital variation in preventable hospitalisation in Australia

## Authors

Michael O Falster, PhD<sup>1</sup>; Alastair H Leyland, PhD<sup>2</sup>; Louisa R Jorm, PhD<sup>1</sup>;

<sup>1</sup> Centre for Big Data Research in Health, UNSW Sydney, Australia

<sup>2</sup> MRC/CSO Social and Public Health Sciences Unit, University of Glasgow, Glasgow UK

## Corresponding author

Dr Michael O. Falster

Centre for Big Data Research in Health, UNSW Sydney

Level 1, AGSM Building (G27), UNSW

Sydney NSW 2052, Australia

+61 (2) 9385 0698

[m.falster@unsw.edu.au](mailto:m.falster@unsw.edu.au)

## Abstract

**Objective:** Preventable hospitalisations are used internationally as a performance indicator for primary care, but the influence of other health system factors remains poorly understood. This study investigated between-hospital variation in rates of preventable hospitalisation.

**Setting:** Linked health survey and hospital admissions data for a cohort study of 266,826 people aged over 45 years in the state of New South Wales, Australia.

**Method:** Between-hospital variation in preventable hospitalisation was quantified using cross-classified multiple-membership multilevel Poisson models, adjusted for personal sociodemographic, health and area-level contextual characteristics. Variation was also explored for two conditions unlikely to be influenced by discretionary admission practice: emergency admissions for acute myocardial infarction (AMI) and hip fracture.

**Results:** We found significant between-hospital variation in adjusted rates of preventable hospitalisation, with hospitals varying on average 26% from the state mean. Patients served more by community and multipurpose facilities (smaller facilities primarily in rural areas) had higher rates of preventable hospitalisation. Community hospitals had the greatest between-hospital variation, and included the facilities with the highest rates of preventable hospitalisation. There was comparatively little between-hospital variation in rates of admission for AMI and hip fracture.

**Conclusions:** Geographic variation in preventable hospitalisation is determined in part by hospitals, reflecting different roles played by community and multipurpose facilities, compared with major and principal referral hospitals, within the community. The indicator cannot be interpreted simply as a performance measure for primary care.

## Strengths and limitations of the study:

- The use of multilevel modelling with detailed patient survey data make this the first study on preventable hospitalisations to have appropriately modelled each of patient-, area- and hospital-level effects.
- There remains unexplained between-hospital variation, and the impact of more complex models of care has yet to be explored
- The study population is not representative of the Australian population, being an older cohort (age 45 and over) with a low response rate

## Introduction

Preventable hospitalisations are an intuitive, yet contentious, performance indicator for primary care. Also known as hospital admissions for ambulatory care sensitive conditions, rates of preventable hospitalisations are used in Australia<sup>1,2</sup> and internationally as a measure of hospital use that could potentially be prevented through timely and effective access to primary care. These admissions are estimated to cost over \$30 billion dollars annually in the US,<sup>3</sup> presenting significant potential cost savings to the healthcare system. However, rates of preventable hospitalisation in Australia have not declined, despite accounting for 6% of all hospitalisations and being a national performance indicator for over 10 years.<sup>4</sup>

Health system performance measures should be underpinned by strong evidence that improvements will lead to improvements in health outcomes,<sup>5</sup> and the utility of preventable hospitalisations as a performance measure has been challenged accordingly.<sup>6</sup> Initially developed in the US where large variations in income, workforce and health insurance coverage result in stark disparities in access to primary care,<sup>7,8</sup> the subsequent adoption of the indicator in various international settings has produced a mixed evidence base, particularly in countries with a universal health care system such as Australia<sup>9</sup>, Canada<sup>10,11</sup> and the UK.<sup>6</sup> The utility of the indicator is likely to differ according to the characteristics of the patient population, and the barriers and facilitators to accessing care in the health system.

One health system factor which remains poorly understood is the role of hospitals. Differences in a hospital's propensity to admit patients can arise from physician preferences<sup>12</sup> and in-hospital capacity.<sup>7,13,14</sup> Anecdotal reports from the UK suggest that hospitals play a direct role in choosing to admit patients for observation, such as in regional areas where long travel times and limited clinical support can lead to more cautious admission thresholds.<sup>15</sup> Australia has a vast geography, and in remote areas hospitals and emergency departments may be used as a substitute for GP care.<sup>16</sup> However evidence on hospitals' influence on preventable hospitalisations is limited: higher rates have been reported in UK hospitals that convert more emergency department presentations into admissions,<sup>17</sup> and in areas in the US with more hospital beds per capita<sup>18</sup> – although the latter finding has been inconsistent.<sup>19,20</sup>

A better understanding of the role of hospitals would improve our understanding of the limitations of preventable hospitalisations as an indicator of primary care. We sought to quantify between-hospital variation in preventable hospitalisation in New South Wales (NSW), Australia, and assess if this variation differs between categories of hospital facilities.

## Methods

### *Study population*

This observational study included participants in The Sax Institute's 45 and Up Study, a prospective cohort of 267,014 residents of NSW, Australia, aged 45 and over.<sup>21</sup> Eligible participants were randomly selected between 2006-2009 through the Department of Human Services enrolment database. At study entry participants completed a detailed questionnaire containing information on their health and sociodemographic characteristics, and provided informed consent for long-term follow-up, including linkage with administrative health data sets, and use of their data for research purposes.

1  
2  
3 For each participant, linked data on hospital admissions (between 2000-2011) and deaths (between  
4 2006-2011) were obtained from the NSW Admitted Patient Data Collection and the NSW Registry of  
5 Births Deaths and Marriages mortality data file, respectively. Data linkage was performed  
6 probabilistically by the NSW Centre for Health Record Linkage (<http://www.cherel.org.au/>).  
7 Participants were excluded if they had an unknown age, area of residence, or inconsistent records  
8 suggesting incorrect linkage (e.g. death before date of study entry).  
9

10  
11  
12 Ethics approval for the 45 and Up Study was given by the University of New South Wales Human  
13 Research Ethics Committee, and ethics approval for this study was given by the NSW Population and  
14 Health Services Research Ethics Committee and the University of Western Sydney Research Ethics  
15 Committee. All analyses were carried out in accordance with these approvals.  
16

### 17 *Hospitalisations, outcomes and exposures*

18  
19 Hospital outcomes were identified using the linked hospital admissions data, from the time of  
20 participants' entry into the study (between 2006-2009) until death or the end of linked data  
21 (31/12/2011), whichever came first. Hospital admissions were restricted to public hospitals only.  
22 Transfers and changes in type of care (e.g. from acute to palliative) within a hospital were  
23 considered a continuation of the same episode of care.  
24

25  
26 Preventable hospitalisations were identified according to the 'selected potentially preventable  
27 hospitalisations' indicator in the Australian National Healthcare Agreement, a composite measure of  
28 hospital admissions for 21 conditions.<sup>22</sup> Two additional outcome measures, for which hospital  
29 admission was unlikely to be influenced by discretionary patterns of care, were used for comparison:  
30 emergency admissions for acute myocardial infarction (AMI) and hip fracture.<sup>14</sup> Hospital diagnosis  
31 and procedure codes used to identify outcomes are in Appendix 1. Sensitivity analyses tested a  
32 recently suggested modification to the preventable hospitalisations indicator, categorising  
33 preventable hospitalisations as short ( $\leq 2$  days length of stay [LOS]) and long (3+ days LOS), on the  
34 basis that shorter admissions may be more amenable to primary prevention.<sup>23</sup>  
35  
36  
37

38  
39 All person-level information was derived from the self-reported survey completed at study entry,  
40 including participants' age, sex, education, marital status, annual household income, employment,  
41 language spoken at home, health insurance status, level of social support, body mass index, healthy  
42 behaviours, multi-morbidity, functional limitation, self-rated health and psychological distress. These  
43 variables reflect patients' predisposition and need to use health services, with most previously found  
44 to be associated with preventable hospitalisation.<sup>9</sup> All variables were treated as categorical, with  
45 missing values as an additional category.<sup>9</sup>  
46  
47

48  
49 Area-level information was assigned according to the Statistical Local Area (SLA) of patient  
50 residence: geographic remoteness used the Accessibility/Remoteness Index of Australia, and the  
51 effective supply of full-time workload equivalent general practitioners (GPs), derived from  
52 aggregated Medicare claims data.<sup>9,24</sup>  
53

54  
55 Hospital category was classified according to hospital peer group, a categorisation used for  
56 benchmarking and reporting that groups hospitals by the types of services provided.<sup>25</sup> For this  
57 analysis, peer groups were collapsed into six broad categories reflecting major differences in the  
58 size, role and location of hospitals: principal ( $>25,000$  acute separations per annum), major  
59 metropolitan (10-25,000 acute separations per annum), major non-metropolitan (10,000+ acute  
60

1  
2  
3 separations per annum, in rural areas), district (2-10,000 acute separations per annum), community  
4 (<2,000 acute separations per annum) and multipurpose (smaller facilities providing integrated  
5 acute health, nursing home, hostel, community health, aged care and non-specialised sub-acute  
6 services) (detailed definitions in Appendix 2).  
7  
8

### 9 *Statistical methods*

10 Between-hospital variation in admission was analysed using cross-classified multiple membership  
11 multilevel Poisson models.<sup>26</sup> All models used number of hospitalisations as the outcome and log of  
12 the follow up time as an offset, so as to model 'rates' of admission, and were adjusted for  
13 participants' sociodemographic and health characteristics, geographic remoteness and supply of GP  
14 services in their area of residence, so the remaining residual variation was that potentially  
15 attributable to hospitals.  
16  
17

18  
19 Multilevel models allow for variation to be partitioned to various 'levels' for analysis, and these  
20 models clustered study participants in both their geographic area of residence (SLA) and all potential  
21 hospitals of admission. Because a patient could be admitted to any number of hospitals, this  
22 clustering was performed using weighted hospital service area networks of all public hospitals  
23 servicing the population.<sup>26</sup> Weighting was determined by patterns of patient flow for all-cause  
24 admissions at the level of the postal-area.  
25  
26

27 From these models, hospital-level incidence rate ratios (IRRs) were derived – the admission rate for  
28 the hospital relative to the state average rate, taking into account the factors in the model, as well as  
29 the size of the hospital's population.<sup>27</sup> The variation between hospital IRRs was measured using the  
30 random intercept variance ( $\sigma^2$ ) from the multilevel model, as well as the average relative deviation  
31 (ARD) which quantifies, on average, how much these adjusted hospitalisation rates differ from the  
32 statewide adjusted admission rate.<sup>28</sup>  
33  
34  
35

36 Overall IRRs for hospital types were derived by including the hospital category in the model, as a  
37 10% increase in provision of hospital services to the patient's postal area, centred on the mean  
38 group value. All analyses were performed in SAS9.4 and MLwiN v2.35.  
39  
40

## 41 **Results**

42 Of 267,014 participants in the linked dataset, n=119 were excluded because they had unknown area  
43 of residence or incompatible dates in the linked data. Participants in 16 postal areas did not have  
44 any hospitalizations during follow-up; the 69 participants residing in these areas were excluded,  
45 leaving 266,826 for analysis, over an average follow-up of 3.7 years. Mean age, self-reported health  
46 and multi-morbidity of study participants were broadly consistent across remoteness categories  
47 (Table 1), although participants in remote areas were slightly younger, with poorer health and a  
48 higher number of comorbidities.  
49  
50  
51

52 The majority of the 30,264 preventable hospitalisations during follow-up were to principal hospitals  
53 (31%) with only a small proportion to community (9.1%) and multipurpose (2.6%) facilities (Table 1).  
54 However, this pattern was inverted for participants in remote and outer regional areas, with the  
55 majority of admissions to community (24.6%) and district hospitals (37.4%). A similar pattern was  
56 observed in the 3,167 emergency AMI and 1,550 emergency hip fracture admissions, although with a  
57  
58  
59  
60

1  
2  
3 smaller proportion of admissions overall to district, community and multipurpose hospitals (data not  
4 shown).  
5

6  
7 There was significant between-hospital variation in preventable hospitalisation, such that each  
8 hospital deviated on average 26% from the mean adjusted rate of admission ( $\sigma^2=0.312$ ; standard  
9 error [SE]=0.059; ARD=25.6). This variation was much less pronounced for emergency admissions for  
10 AMI ( $\sigma^2=0.047$ ; SE=0.026; ARD=9.6) and was not significant for hip fracture ( $\sigma^2=0.015$ ; SE=0.017;  
11 ARD=2.9)  
12

13  
14 Figure 1 shows hospital-level IRRs from the multilevel model, which indicate how each hospital  
15 differs from the state average, after adjusting for patient and geographic factors. There was  
16 considerable variation in preventable hospitalisation, with 7% of hospitals having significantly higher  
17 or lower than average adjusted rates of admission. When stratified by category of hospital, the  
18 greatest variation was seen in community, district and multipurpose hospitals, with community  
19 hospitals in particular having the highest rates of preventable hospitalisation – up to 4 times the  
20 average rate of admission. There were no hospitals with significant deviations from the mean for  
21 emergency AMI or hip fracture admissions.  
22

23  
24 ARDs stratified by hospital category (Figure 1) corroborated these results, with community hospitals  
25 having the highest levels of variation in preventable hospitalisation (average 36% difference from  
26 the mean), and principal hospitals varying the least (average 21% difference from the mean). There  
27 was less variation between all hospital types for emergency AMI or hip fracture admissions than  
28 preventable hospitalisations,  
29

30  
31  
32 The inclusion of hospital category in the regression models (Table 2) showed significantly higher  
33 rates of preventable hospitalisations among people serviced by community (IRR:1.06; 95% CIs:1.02-  
34 1.10) and multipurpose (IRR:1.05; 95% CIs:1.01-1.09) than principal hospitals. For emergency AMI  
35 admissions, there were significantly higher rates in people serviced by major non-metropolitan  
36 (IRR:1.04; 95% CIs:1.02-1.07), and lower rates among people serviced by multipurpose facilities  
37 (IRR:0.93; 95% CIs:0.88-0.99). IRRs for all variables in the model are provided in Appendix 3.  
38  
39

40  
41 A sensitivity analysis categorising preventable hospitalisations as short or long stay admissions (Table  
42 3) found differing patterns of variation by length of stay, with the significantly higher rates of  
43 admission for community and multipurpose hospitals restricted to short-stay preventable  
44 hospitalisations only.  
45

## 46 47 Discussion

48  
49 We found significant variation in rates of preventable hospitalisation between public hospitals, even  
50 after adjustment for patient and geographic factors. Our finding was most marked for community  
51 and multipurpose hospitals – smaller facilities which provide the majority of services to patients  
52 living in regional and remote communities. Given similar variation was not observed for other less-  
53 discretionary conditions, major hospitals servicing regional areas, or for admissions with a longer  
54 length of stay, our findings indicate a varying propensity to admit patients for preventable  
55 hospitalisation among and between categories of hospital facilities.  
56  
57

58  
59 Our findings do not suggest that preventable hospitalisations should be used as indicator of  
60 discretionary admission practice – the effect size was modest and, consistent with prior research,



1  
2  
3 the strongest predictors of admission were patient sociodemographic and health characteristics.<sup>9</sup>  
4 But while admissions to community and multipurpose hospitals represented only a small proportion  
5 (12%) of all preventable hospitalisations, they made up 55% of admissions in remote areas of  
6 Australia, where there is both high variability - with over a five-fold variation in rates of preventable  
7 hospitalisations<sup>2</sup> - and also the highest rates of admission.<sup>1,2</sup> Accordingly, these differences in  
8 admission practices are likely to play an important role in driving geographic variation in the  
9 preventable hospitalisations performance indicator. The implications for performance measurement  
10 are clear: interpretation of the indicator is complex and factors along the care continuum, including  
11 hospitals' propensity to admit, influence variation in admission rates.  
12  
13  
14

15  
16 There is very little existing evidence about how admissions for preventable hospitalisations vary  
17 between hospitals in Australia. One study of major hospitals in NSW reported up to 11-fold and 7-  
18 fold variation between hospitals in the proportion of admissions that were for congestive heart  
19 failure and chronic obstructive pulmonary disease respectively,<sup>29</sup> and earlier work from the current  
20 team found no association between preventable hospitalisations and hospital bed occupancy rates.<sup>26</sup>  
21 Importantly, these previous analyses (as with most hospital reporting) excluded community and  
22 multipurpose hospitals - the facilities in this study with the strongest patterns of variation. It is  
23 difficult to assess causes of between-hospital variation in the context of this analysis. Both  
24 differences in hospital roles (e.g. provision of both acute and sub-acute services) and differences in  
25 discretionary admission thresholds (e.g. admitting patients for observation to avoid long travel  
26 times<sup>15</sup>) could contribute, as well as the provision of community-based services such as hospital in  
27 the home<sup>30</sup>.  
28  
29  
30

31  
32 Our study is among a few internationally to provide evidence of a hospital-level difference in  
33 propensity to admit patients for preventable hospitalisations,<sup>17,18</sup> and is the first to quantify the  
34 extent of this variation. The findings, while not directly applicable to different health care settings,  
35 highlight the contextual differences between health systems which should be considered when  
36 adopting international performance indicators, as well as the need for localised policy responses  
37 tailored to models of care. Use of the preventable hospitalisations indicator beyond its original  
38 intent—as a yardstick measure of health system performance<sup>7</sup>—needs to be approached with  
39 caution.  
40  
41  
42

43  
44 The key strength of this study is the use of a large cohort with detailed survey and linked health  
45 data. Much inference on preventable hospitalisation is limited either by unmeasured confounders or  
46 the use of ecological measures of patient demographics, and estimation of hospital effects can be  
47 difficult given the lack of a discrete population denominator. The use of cross-classified multiple  
48 membership multilevel models makes this the only study to perform appropriate modelling for each  
49 of patient-, area- and hospital-level effects. A limitation is that unexplained hospital variation  
50 remained, and we had only limited data on hospital characteristics, so the impact of more complex  
51 models of care, such as integrated care programs, has yet to be explored. Generalizability of our  
52 findings may also be limited given the older age (45 years and over) and low response rate (18%) of  
53 the study cohort, although the considerable size and heterogeneity of the study mean inferences  
54 from within-cohort comparisons remain valid.<sup>31</sup>  
55  
56  
57  
58  
59  
60

## Conclusion

Geographic variation in rates of preventable hospitalisation is determined in part by the hospitals themselves, reflecting different roles of smaller and rural hospitals compared with major and principal referral hospitals. International adoption of the preventable hospitalisations health performance indicator should consider the contextual barriers and facilitators to accessing care in the relevant health system. In Australia, preventable hospitalisations cannot be interpreted simply as a measure of accessibility and quality of primary care.

For peer review only

## Funding

This study was funded by a National Health and Medical Research Council Partnership Project Grant (#1036858) and by partner agencies the Australian Commission on Safety and Quality in Health Care, the Agency for Clinical Innovation and the NSW Bureau of Health Information. MF is supported by a National Health and Medical Research Council Early Career Fellowship (#1139133). AL receives funding from the Medical Research Council (MC\_UU\_12017/13) and the Scottish Government Chief Scientist Office (SPHSU13).

## Acknowledgements

The authors would like to thank Federico Girosi and the Australian Primary Health Care Research Institute at the Australian National University for assistance with the data. This research was completed using data collected through the 45 and Up Study ([www.saxinstitute.org.au](http://www.saxinstitute.org.au)). The 45 and Up Study is managed by the Sax Institute in collaboration with major partner Cancer Council NSW; and partners: National Heart Foundation of Australia (NSW Division); NSW Ministry of Health; NSW Government Family & Community Services – Ageing, Carers and the Disability Council NSW; and the Australian Red Cross Blood Service. We thank the many thousands of people participating in the 45 and Up Study. We thank the Sax Institute, the NSW Ministry of Health and the NSW Register of Births, Deaths and Marriages for allowing access to the data, and the Centre for Health Record Linkage for conducting the probabilistic linkage of records.

## Data availability

The data set used for this study was constructed from pre-existing source data sets (routinely collected data and the 45 and Up Study) with the permission from the custodians of each of these data sets and with specific ethical approval. The data set could potentially be made available to other researchers if they obtain the necessary approvals. Further information on this process can be obtained from the 45 and Up Study ([45andUp.research@saxinstitute.org.au](mailto:45andUp.research@saxinstitute.org.au)) and the NSW Centre for Health Record Linkage ([cherel.mail@moh.health.nsw.gov.au](mailto:cherel.mail@moh.health.nsw.gov.au)).

## Author contributions

MOF conceived the project, undertook the literature review, performed data analysis and drafted the manuscript. LRJ and AHL provided guidance and interpretation. All three authors edited, reviewed and approved the final manuscript. LRJ conceived the APHID study

## Competing interests

None declared

## References

- 1 Australian Commission on Safety and Quality in Health Care and Australian Institute of Health and Welfare.. The Second Australian Atlas of Healthcare Variation. (ACSQHC, Sydney, 2017).
- 2 National Health Performance Authority. Healthy Communities: Potentially preventable hospitalisations in 2013–14. (NHPA, Sydney, 2015).
- 3 Torio, C. M., Elixhauser, A. & Andrews, R. M. Trends in potentially preventable hospital admissions among adults and children, 2005–2010. (Agency for Healthcare Research and Quality, Rockville, MD, 2013).
- 4 Australian Institute of Health and Welfare. Admitted patient care 2014–15: Australian hospital statistics. (AIHW, Canberra, 2016).
- 5 Baker, D. W. & Chassin, M. R. Holding Providers Accountable for Health Care Outcomes. *Annals of Internal Medicine* **167**, 418-423, doi:10.7326/M17-0691 (2017).
- 6 Giuffrida, A., Gravelle, H. & Roland, M. Measuring quality of care with routine data: avoiding confusion between performance indicators and health outcomes. *Brit Med J* **319**, 94-98, doi:10.1136/bmj.319.7202.94 (1999).
- 7 Billings, J. *et al.* Impact of socioeconomic status on hospital use in New York City. *Health Affairs (Project Hope)* **12**, 162-173 (1993).
- 8 Weissman, J. S., Gatsonis, C. & Epstein, A. M. Rates of avoidable hospitalization by insurance status in Massachusetts and Maryland. *JAMA* **268**, 2388-2394 (1992).
- 9 Falster, M. O. *et al.* Sociodemographic and health characteristics, rather than primary care supply, are major drivers of geographic variation in preventable hospitalizations in Australia. *Med Care* **53**, 436-445, doi:10.1097/MLR.0000000000000342 (2015).
- 10 Roos, L. L., Walld, R., Uhanova, J. & Bond, R. Physician visits, hospitalizations, and socioeconomic status: ambulatory care sensitive conditions in a canadian setting. *Health Serv Res* **40**, 1167-1185, doi:10.1111/j.1475-6773.2005.00407.x (2005).
- 11 Trachtenberg, A. J., Dik, N., Chateau, D. & Katz, A. Inequities in ambulatory care and the relationship between socioeconomic status and respiratory hospitalizations: a population-based study of a Canadian city. *Annals of Family Medicine* **12**, 402-407, doi:10.1370/afm.1683 (2014).
- 12 Dean, N. C. *et al.* Hospital admission decision for patients with community-acquired pneumonia: variability among physicians in an emergency department. *Ann Emerg Med* **59**, 35-41, doi:10.1016/j.annemergmed.2011.07.032 (2012).
- 13 Fisher, E. S. *et al.* Associations among hospital capacity, utilization, and mortality of US Medicare beneficiaries, controlling for sociodemographic factors. *Health Serv Res* **34**, 1351-1362 (2000).
- 14 Wennberg, J., McPherson, K. & Goodman, D. in *Medical Practice Variations* (eds Ana Johnson & Thérèse Stukel) 1-25 (Springer US, 2016).
- 15 Culliton, G. Large variance in hospitals' 'propensity to admit', in *Irish Medical Times* (2016).
- 16 National Health Performance Authority. Healthy Communities: Use of emergency department and GP services in 2013-14. (NHPA, Sydney, 2016).
- 17 O'Cathain, A. *et al.* Hospital characteristics affecting potentially avoidable emergency admissions: national ecological study. *Health Services Management Research* **26**, 110-118, doi:10.1177/0951484814525357 (2013).
- 18 Zhan, C., Miller, M. R., Wong, H. & Meyer, G. S. The effects of HMO penetration on preventable hospitalizations. *Health Serv Res* **39**, 345-361, doi:10.1111/j.1475-6773.2004.00231.x (2004).
- 19 Basu, J., Friedman, B. & Burstin, H. Primary care, HMO enrollment, and hospitalization for ambulatory care sensitive conditions: a new approach. *Med Care* **40**, 1260-1269, doi:10.1097/01.MLR.0000036409.56436.ED (2002).

- 1  
2  
3 20 Berlin, C., Busato, A., Rosemann, T., Djalali, S. & Maessen, M. Avoidable hospitalizations in  
4 Switzerland: a small area analysis on regional variation, density of physicians, hospital supply  
5 and rurality. *BMC Health Serv Res* **14**, 289, doi:info:pmid/24992827 (2014).  
6  
7 21 Banks, E. *et al.* Cohort profile: the 45 and up study. *International Journal of Epidemiology* **37**,  
8 941-947, doi:10.1093/ije/dym184 (2008).  
9 22 AIHW. *National Healthcare Agreement: PI 22-Selected potentially preventable*  
10 *hospitalisations, 2012*, <<http://meteor.aihw.gov.au/content/index.phtml/itemId/443687>>  
11 (2012).  
12 23 Swerissen, H., Duckett, S. & Wright, J. Chronic failure in primary care. Report No. 2016-2,  
13 (Grattan Institute, 2016).  
14 24 Mazumdar, S., Konings, P., Butler, D. & McRae, I. S. General practitioner (family physician)  
15 workforce in Australia: comparing geographic data from surveys, a mailing list and medicare.  
16 *BMC Health Serv Res* **13**, 343, doi:10.1186/1472-6963-13-343 (2013).  
17 25 NSW Health. *NSW Health Services Comparison Data Book 2008/2009*. (Demand and  
18 Performance Evaluation, NSW Health, North Sydney, NSW, 2010).  
19 26 Falster, M. O., Jorm, L. R. & Leyland, A. H. Using Weighted Hospital Service Area Networks to  
20 Explore Variation in Preventable Hospitalization. *Health Serv Res* **53**, 3148-3169,  
21 doi:10.1111/1475-6773.12777 (2018).  
22 27 Merlo, J., Chaix, B., Yang, M., Lynch, J. & Rastam, L. A brief conceptual tutorial of multilevel  
23 analysis in social epidemiology: linking the statistical concept of clustering to the idea of  
24 contextual phenomenon. *J Epidemiol Community Health* **59**, 443-449,  
25 doi:10.1136/jech.2004.023473 (2005).  
26 28 Tarkiainen, L., Martikainen, P., Laaksonen, M. & Leyland, A. H. Comparing the effects of  
27 neighbourhood characteristics on all-cause mortality using two hierarchical areal units in the  
28 capital region of Helsinki. *Health Place* **16**, 409-412, doi:10.1016/j.healthplace.2009.10.008  
29 (2010).  
30 29 Bureau of Health Information. *Chronic disease care: A piece of the picture*. (BHI, Sydney,  
31 Australia, 2011).  
32 30 NSW Ministry of Health. *Hospital in the Home Guideline*. (NSW Ministry of Health, North  
33 Sydney, 2013).  
34 31 Mealing, N. M. *et al.* Investigation of relative risk estimates from studies of the same  
35 population with contrasting response rates and designs. *BMC Medical Research*  
36 *Methodology* **10**, 26, doi:10.1186/1471-2288-10-26 (2010).  
37  
38  
39  
40  
41  
42  
43  
44  
45  
46  
47  
48  
49  
50  
51  
52  
53  
54  
55  
56  
57  
58  
59  
60

## Tables and Figures

**Table 1: Cohort characteristics at baseline, and number of preventable hospitalisations during follow-up, by remoteness of area of residence**

|                                     | Total       | By remoteness category of residence |                |                |            |
|-------------------------------------|-------------|-------------------------------------|----------------|----------------|------------|
|                                     |             | Major cities                        | Inner regional | Outer regional | Remote     |
| <b>Cohort characteristics</b>       |             |                                     |                |                |            |
| N                                   | 266,826     | 119,496                             | 94,568         | 47,438         | 5,324      |
| Age (mean)                          | 62.7        | 63.4                                | 62.4           | 62.2           | 60.7       |
| Age (IQR)                           | 53.6-70.4   | 53.6-71.9                           | 53.8-69.7      | 53.7-69.4      | 52.0-67.8  |
| % Female                            | 53.6        | 52.4                                | 54.7           | 54.3           | 55.5       |
| % fair/poor self-rated health       | 13.7        | 13.9                                | 13.4           | 13.7           | 16.1       |
| % with >3 comorbidities             | 7.4         | 7.3                                 | 7.5            | 7.2            | 8.0        |
| <b>Preventable hospitalisations</b> |             |                                     |                |                |            |
| Number of admissions                | 30,264      | 12,512                              | 10,161         | 6512           | 1079       |
| Admissions to hospital type (%)     |             |                                     |                |                |            |
| - Principal                         | 9398 (31.0) | 7506 (60.0)                         | 1600 (15.7)    | 255 (3.9)      | 37 (3.4)   |
| - Major metropolitan                | 4172 (13.8) | 3321 (26.5)                         | 787 (7.7)      | 61 (0.9)       | 3 (0.3)    |
| - Major non-metropolitan            | 6443 (21.3) | 560 (4.5)                           | 3933 (38.7)    | 1872 (28.7)    | 78 (7.2)   |
| - District                          | 6715 (22.2) | 804 (6.4)                           | 3070 (30.2)    | 2468 (37.9)    | 373 (34.6) |
| - Community                         | 2760 (9.1)  | 278 (2.2)                           | 611 (6.1)      | 1491 (22.9)    | 380 (35.2) |
| - Multipurpose                      | 776 (2.6)   | 43 (0.3)                            | 160 (1.6)      | 365 (5.6)      | 208 (19.3) |

**Table 2: Incidence rate ratio (IRR) of hospital category for preventable hospitalisation and emergency admissions for acute myocardial infarction (AMI) and hip fracture**

| Hospital category      | Preventable hospitalisations |               | AMI (emergency) |               | Hip fracture (emergency) |               |
|------------------------|------------------------------|---------------|-----------------|---------------|--------------------------|---------------|
|                        | IRR                          | (95% CIs)     | IRR             | (95% CIs)     | IRR                      | (95% CIs)     |
| Principal              | 1.00                         | (ref)         | 1.00            | (ref)         | 1.00                     | (ref)         |
| Major metropolitan     | 0.99                         | (0.95 – 1.03) | 1.02            | (0.99 – 1.05) | 1.02                     | (0.99 – 1.05) |
| Major non-metropolitan | 1.01                         | (0.97 – 1.04) | 1.04            | (1.02 – 1.07) | 0.99                     | (0.96 – 1.02) |
| District               | 1.02                         | (0.99 – 1.06) | 1.00            | (0.97 – 1.03) | 0.99                     | (0.96 – 1.02) |
| Community              | 1.06                         | (1.02 – 1.10) | 0.97            | (0.93 – 1.01) | 0.96                     | (0.91 – 1.01) |
| Multipurpose           | 1.05                         | (1.01 – 1.09) | 0.93            | (0.88 – 0.99) | 1.02                     | (0.94 – 1.09) |

**Table 3: Average relative deviation (ARD) and Incidence rate ratio (IRR) by hospital category for rates of preventable hospitalisation, separated as short-stay (0-2 days length of stay) and long-stay (>2 days length of stay) admissions**

| Hospital category      | Short stay<br>(0-2 days length of stay) |      |               | Long stay<br>(>2 days length of stay) |      |               |
|------------------------|-----------------------------------------|------|---------------|---------------------------------------|------|---------------|
|                        | ARD                                     | IRR  | (95% CIs)     | ARD                                   | IRR  | (95% CIs)     |
| Principal              | 17.9                                    | 1.00 | (ref)         | 14.6                                  | 1.00 | (ref)         |
| Major metropolitan     | 25.5                                    | 0.99 | (0.95 – 1.02) | 25.9                                  | 1.00 | (0.97 – 1.03) |
| Major non-metropolitan | 22.7                                    | 1.02 | (0.98 – 1.05) | 11.3                                  | 0.99 | (0.96 – 1.02) |
| District               | 30.4                                    | 1.02 | (0.99 – 1.05) | 24.3                                  | 0.98 | (0.95 – 1.00) |
| Community              | 17.5                                    | 1.04 | (1.01 – 1.07) | 25.7                                  | 1.02 | (0.99 – 1.05) |
| Multipurpose           | 24.3                                    | 1.04 | (1.00 – 1.08) | 11.6                                  | 0.99 | (0.95– 1.03)  |



1  
2  
3 *Figure 1: Hospital-specific incidence rate ratios from the mean adjusted rate of admission, for*  
4 *preventable hospitalisation and emergency admissions for acute myocardial infarction (AMI) and*  
5 *hip fracture, overall and stratified by hospital category*  
6  
7  
8

9  
10  
11  
12  
13  
14  
15  
16  
17  
18  
19  
20  
21  
22  
23  
24  
25  
26  
27  
28  
29  
30  
31  
32  
33  
34  
35  
36  
37  
38  
39  
40  
41  
42  
43  
44  
45  
46  
47  
48  
49  
50  
51  
52  
53  
54  
55  
56  
57  
58  
59  
60

ARD = average relative deviation. Red and blue markers indicate hospitals with significantly higher and lower rates of admission respectively. Adjusted for patient sociodemographic and health factors, remoteness and supply of GP services in area of residence

For peer review only

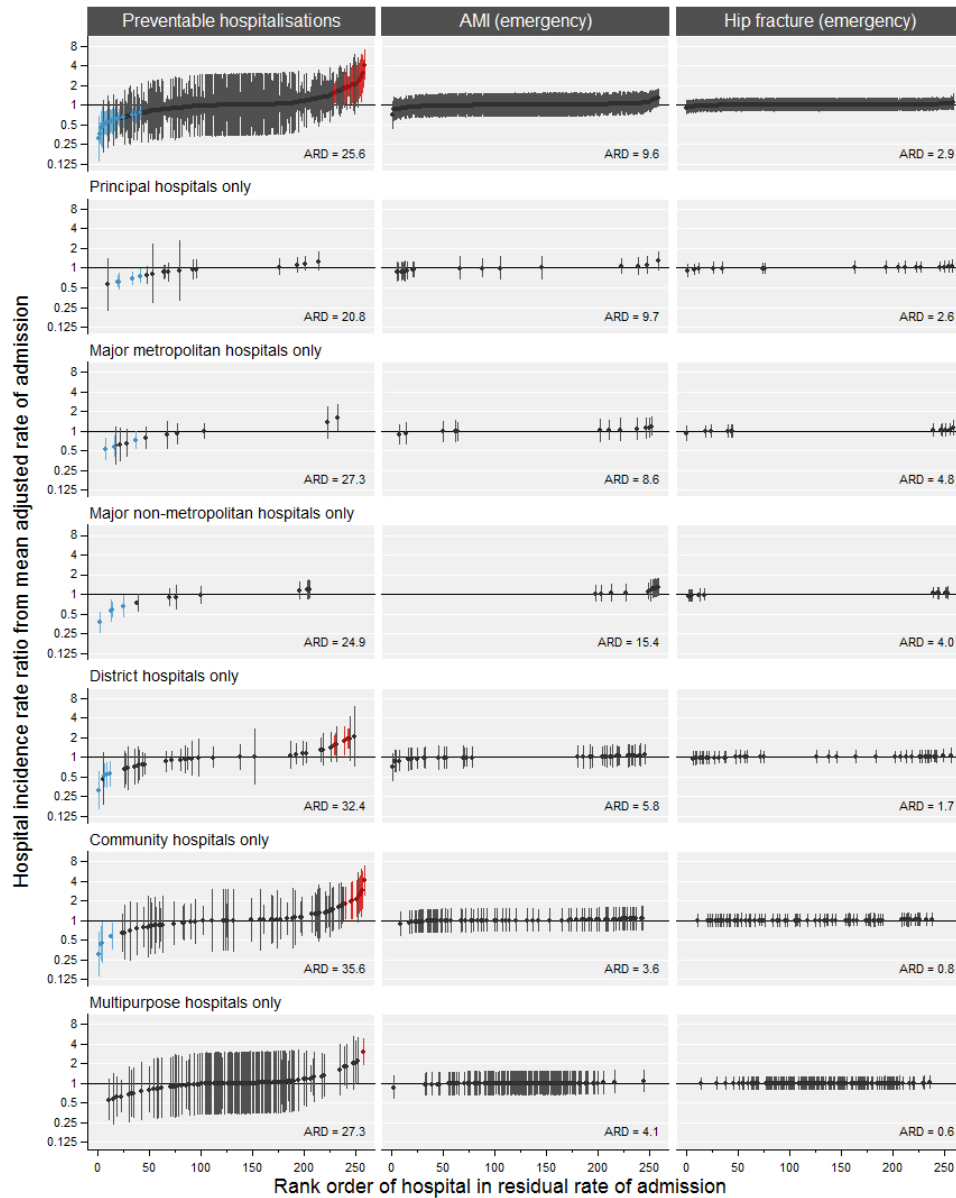

Hospital-specific incidence rate ratios from the mean adjusted rate of admission, for preventable hospitalisation and emergency admissions for acute myocardial infarction (AMI) and hip fracture, overall and stratified by hospital category

301x377mm (72 x 72 DPI)

## Online appendices

### Appendix 1:

ICD-10-AM codes for identifying hospital outcomes.

| Category                                     | ICD-10-AM diagnosis and procedure codes                                                                                                                                                                                                                                                                                                                                                                                                                                                                                                                                                                                                                                                                                                                                                                                              |
|----------------------------------------------|--------------------------------------------------------------------------------------------------------------------------------------------------------------------------------------------------------------------------------------------------------------------------------------------------------------------------------------------------------------------------------------------------------------------------------------------------------------------------------------------------------------------------------------------------------------------------------------------------------------------------------------------------------------------------------------------------------------------------------------------------------------------------------------------------------------------------------------|
| <b>Preventable hospitalisations</b>          |                                                                                                                                                                                                                                                                                                                                                                                                                                                                                                                                                                                                                                                                                                                                                                                                                                      |
| Angina                                       | I20, I24.0, I24.8, I24.9 as principal diagnosis only, exclude cases with procedure codes not in blocks [1820] to [2016]                                                                                                                                                                                                                                                                                                                                                                                                                                                                                                                                                                                                                                                                                                              |
| Asthma                                       | J45, J46 as principal diagnosis only                                                                                                                                                                                                                                                                                                                                                                                                                                                                                                                                                                                                                                                                                                                                                                                                 |
| Chronic obstructive pulmonary disease (COPD) | J20, J41, J42, J43, J44, J47 as principal diagnosis only, J20 only with additional diagnoses of J41, J42, J43, J44, J47                                                                                                                                                                                                                                                                                                                                                                                                                                                                                                                                                                                                                                                                                                              |
| Congestive cardiac failure                   | I50, I11.0, J81 as principal diagnosis only, exclude cases with the following procedure codes: 33172-00, 35304-00, 35305-00, 35310-02, 35310-00, 38281-11, 38281-07, 38278-01, 38278-00, 38281-02, 38281-01, 38281-00, 38256-00, 38278-03, 38284-00, 38284-02, 38521-09, 38270-01, 38456-19, 38456-15, 38456-12, 38456-11, 38456-10, 38456-07, 38456-01, 38470-00, 38475-00, 38480-02, 38480-01, 38480-00, 38488-06, 38488-04, 38489-04, 38488-02, 38489-03, 38487-00, 38489-02, 38488-00, 38489-00, 38490-00, 38493-00, 38497-04, 38497-03, 38497-02, 38497-01, 38497-00, 38500-00, 38503-00, 38505-00, 38521-04, 38606-00, 38612-00, 38615-00, 38653-00, 38700-02, 38700-00, 38739-00, 38742-02, 38742-00, 38745-00, 38751-02, 38751-00, 38757-02, 38757-01, 38757-00, 90204-00, 90205-00, 90219-00, 90224-00, 90214-00, 90214-02. |
| Diabetes complications                       | E10–E14.9 as principal diagnoses, and E10–E14.9 as additional diagnoses where the principal diagnosis was: hypersmolarity (E87.0), acidosis (E87.2), transient ischaemic attack (G45), nerve disorders and neuropathies (G50–G64), cataracts and lens disorders (H25–H28), retinal disorders (H30–H36), glaucoma (H40–H42), myocardial infarction (I21–I22), other coronary heart diseases (I20, I23–I25), heart failure (I50), stroke and sequelae (I60–I64, I69.0–I69.4), peripheral vascular disease (I70–I74), gingivitis and periodontal disease (K05), kidney diseases including end-stage renal disease (N00–N29), and renal dialysis (Z49)                                                                                                                                                                                   |
| Hypertension                                 | I10, I11.9 as principal diagnosis only, exclude cases with procedure codes according to the list of procedures excluded from the Congestive cardiac failure category above.                                                                                                                                                                                                                                                                                                                                                                                                                                                                                                                                                                                                                                                          |
| Iron deficiency anaemia                      | D50.1, D50.8, D50.9 as principal diagnosis only.                                                                                                                                                                                                                                                                                                                                                                                                                                                                                                                                                                                                                                                                                                                                                                                     |
| Nutritional deficiencies                     | E40, E41, E42, E43, E55.0, E64.3 as principal diagnosis only.                                                                                                                                                                                                                                                                                                                                                                                                                                                                                                                                                                                                                                                                                                                                                                        |
| Rheumatic heart disease                      | I00 to I09 as principal diagnosis only. (Note: includes acute rheumatic fever)                                                                                                                                                                                                                                                                                                                                                                                                                                                                                                                                                                                                                                                                                                                                                       |
| Appendicitis with generalised peritonitis    | K35.0 in any diagnosis field                                                                                                                                                                                                                                                                                                                                                                                                                                                                                                                                                                                                                                                                                                                                                                                                         |
| Cellulitis                                   | L03, L04, L08, L88, L98.0, L98.3 as principal diagnosis only, exclude cases with any procedure except those in blocks 1820 to 2016 or if procedure is 30216-02, 30676-00, 30223-02, 30064-00, 34527-01, 34527-00, 90661-00 and this is the only listed procedure                                                                                                                                                                                                                                                                                                                                                                                                                                                                                                                                                                     |
| Convulsions and epilepsy                     | G40, G41, O15, R56 as principal diagnosis only                                                                                                                                                                                                                                                                                                                                                                                                                                                                                                                                                                                                                                                                                                                                                                                       |
| Dehydration and gastroenteritis              | A09.9, E86, K52.2, K52.8, K52.9 as principal diagnosis only.                                                                                                                                                                                                                                                                                                                                                                                                                                                                                                                                                                                                                                                                                                                                                                         |
| Dental conditions                            | K02, K03, K04, K05, K06, K08, K09.8, K09.9, K12, K13 as principal diagnosis only.                                                                                                                                                                                                                                                                                                                                                                                                                                                                                                                                                                                                                                                                                                                                                    |
| Ear, nose and throat infections              | H66, H67, J02, J03, J06, J31.2 as principal diagnosis only.                                                                                                                                                                                                                                                                                                                                                                                                                                                                                                                                                                                                                                                                                                                                                                          |
| Gangrene                                     | R02 in any diagnosis field                                                                                                                                                                                                                                                                                                                                                                                                                                                                                                                                                                                                                                                                                                                                                                                                           |
| Pelvic inflammatory disease                  | N70, N73, N74 as principal diagnosis only.                                                                                                                                                                                                                                                                                                                                                                                                                                                                                                                                                                                                                                                                                                                                                                                           |
| Perforated/bleeding ulcer                    | K25.0, K25.1, K25.2, K25.4, K25.5, K25.6, K26.0, K26.1, K26.2, K26.4, K26.5, K26.6, K27.0, K27.1, K27.2, K27.4, K27.5, K27.6, K28.0, K28.1, K28.2, K28.4, K28.5, K28.6 as principal diagnosis only.                                                                                                                                                                                                                                                                                                                                                                                                                                                                                                                                                                                                                                  |
| Pyelonephritis                               | N10, N11, N12, N13.6, N39.0 as principal diagnosis only.                                                                                                                                                                                                                                                                                                                                                                                                                                                                                                                                                                                                                                                                                                                                                                             |
| Influenza and pneumonia                      | J10, J11, J13, J14, J15.3, J15.4, J15.7, J15.9, J16.8, J18.1, J18.8 in any diagnosis field, excludes cases with additional diagnosis of D57 (sickle-cell disorders) and people under 2 months                                                                                                                                                                                                                                                                                                                                                                                                                                                                                                                                                                                                                                        |
| Other vaccine-preventable conditions         | A35, A36, A37, A80, B05, B06, B16.1, B16.9, B18.0, B18.1, B26, G00.0, M01.4 in any diagnosis field                                                                                                                                                                                                                                                                                                                                                                                                                                                                                                                                                                                                                                                                                                                                   |
| Acute myocardial infarction (AMI)            | I21                                                                                                                                                                                                                                                                                                                                                                                                                                                                                                                                                                                                                                                                                                                                                                                                                                  |
| Hip fracture                                 | S72.0, S72.1, S72.2                                                                                                                                                                                                                                                                                                                                                                                                                                                                                                                                                                                                                                                                                                                                                                                                                  |

## Appendix 2:

Hospital categories, corresponding peer groups from the *NSW Health Services Comparison Data Book 2008/2009*, and number all cause admissions during follow-up.

| Hospital Peer Group                 | Description                                                                                                                                                                                                                                                                                                                                                    | Admissions |
|-------------------------------------|----------------------------------------------------------------------------------------------------------------------------------------------------------------------------------------------------------------------------------------------------------------------------------------------------------------------------------------------------------------|------------|
| <b>Principal</b>                    |                                                                                                                                                                                                                                                                                                                                                                |            |
| A1a Principal Referral Group A      | Acute hospitals, treating 25,000 or more acute casemix weighted separations per annum, with an average cost weight greater than 1 and having more than 1 specialty service.                                                                                                                                                                                    | 76,193     |
| A1b Principal Referral Group B      | Acute hospitals, treating 25,000 or more acute casemix weighted separations per annum, with an average cost weight greater than 1 and 1 or fewer specialty services.                                                                                                                                                                                           | 28,424     |
| A2 Paediatric Specialist            | Establishments where the primary role is to provide specialist acute care services for children.                                                                                                                                                                                                                                                               | -          |
| A3 Ungrouped Acute                  | Establishments whose primary role is the provision of acute services of a specialised nature for which there is insufficient peers to form additional peer groups.                                                                                                                                                                                             | 6,284      |
| <b>Major metropolitan</b>           |                                                                                                                                                                                                                                                                                                                                                                |            |
| B1 Major Metropolitan:              | Acute hospitals, treating 10,000 or more acute casemix weighted separations per annum, but having less than 25,000 acute casemix weighted separations or an average casemix weight of less than 1.                                                                                                                                                             | 30,512     |
| <b>Major non-metropolitan</b>       |                                                                                                                                                                                                                                                                                                                                                                |            |
| B2 Major Non-Metropolitan:          | Acute hospitals treating 10,000 or more acute casemix weighted separations per annum that are located in rural areas providing acute specialist and referral services for a catchment population from a large geographical area.                                                                                                                               | 68,460     |
| <b>District</b>                     |                                                                                                                                                                                                                                                                                                                                                                |            |
| C1 District Group 1                 | Acute hospitals, treating 5,000 or more, but less than 10,000 acute casemix weighted separations per annum.                                                                                                                                                                                                                                                    | 27,671     |
| C2 District Group 2                 | Acute hospitals, treating 2,000 or more, but less than 5,000 acute casemix weighted separations per annum, plus acute hospitals treating less than 2,000 acute casemix weighted separations per annum but with more than 2,000 separations per annum.                                                                                                          | 29,470     |
| <b>Community</b>                    |                                                                                                                                                                                                                                                                                                                                                                |            |
| D1a Community Acute with Surgery    | Acute hospitals, treating less than 2,000 acute casemix weighted separations per annum, and less than 2,000 acute separations per annum, with less than 40% nonacute and outlier bed days of total bed days and greater than 2% of their acute weighted separations being surgical.                                                                            | 6,352      |
| D1b Community Acute without Surgery | Acute hospitals, treating less than 2,000 acute casemix weighted separations per annum, and less than 2,000 acute separations per annum, with less than 40% nonacute and outlier bed days of total bed days, and less than 2% of their acute weighted separations being surgical.                                                                              | 3,620      |
| D2 Community Non-Acute              | Non-acute hospitals, treating less than 2,000 acute casemix weighted separations per annum, and less than 2,000 acute separations per annum, with more than 40% nonacute and outlier bed days of total bed days.                                                                                                                                               | 3,061      |
| <b>Multi-purpose</b>                |                                                                                                                                                                                                                                                                                                                                                                |            |
| F1 Psychiatric                      | Establishments devoted primarily to the treatment and care of inpatients with psychiatric, mental or behavioural disorders. Centres of non-acute treatment of drug dependence, developmental and intellectual disability are not included here. This group also excludes institutions mainly providing living quarters or day care.                            | 195        |
| F2 Nursing Homes                    | Establishments which provide long-term care involving regular base nursing care to chronically ill, frail, disabled or convalescent persons or senile inpatients. They must be approved by the Commonwealth Department of Health and Family Services and /or licensed by the State, or controlled by government departments.                                   | 184        |
| F3 Multi-Purpose Services           | Multi-Purpose Services (MPSs) which provide integrated acute health, nursing home, hostel, community health and aged care services under one organisational structure, as agreed between the Commonwealth and State Governments. MPSs provide a range of services which are negotiated with the community, the service providers and the relevant Departments. | 4,493      |
| F4 Sub Acute                        | Establishments that primarily provide sub-acute services, but are not specialist palliative care or specialist rehabilitation establishments.                                                                                                                                                                                                                  | 2,588      |
| F5 Palliative Care                  | Establishments with a specific function of providing palliative care to terminally ill patients.                                                                                                                                                                                                                                                               | 86         |
| F6 Rehabilitation                   | Establishments with a primary role in providing services to persons with an impairment, disability or handicap where the primary goal is improvement in functional status.                                                                                                                                                                                     | 34         |
| F7 Mothercraft                      | Establishments where the primary role is to help mothers acquire mothercraft skills in an inpatient setting.                                                                                                                                                                                                                                                   | 5          |
| F8 Ungrouped Non-Acute              | Establishments whose primary role is the provision of non-acute services, but for which there are insufficient peers to form an addition peer group. Limited comparisons can be made within this peer group and with other non-acute facilities.                                                                                                               | 328        |

### Appendix 3:

Incidence rate ratio (IRR) of patient-, area- and hospital-level factors from cross-classified multiple membership multilevel Poisson models on preventable hospitalisations and emergency admissions for acute myocardial infarction (AMI) and hip fracture

|                                | Preventable hospitalisation |               | AMI (emergency) |               | Hip fracture (emergency) |               |
|--------------------------------|-----------------------------|---------------|-----------------|---------------|--------------------------|---------------|
|                                | IRR                         | (95% CIs)     | IRR             | (95% CIs)     | IRR                      | (95% CIs)     |
| <b>Patient-level factors</b>   |                             |               |                 |               |                          |               |
| Age                            |                             |               |                 |               |                          |               |
| 45-54 years                    | 1.00                        | (ref)         | 1.00            | (ref)         | 1.00                     | (ref)         |
| 55-64 years                    | 1.23                        | (1.18 - 1.29) | 1.71            | (1.49 - 1.97) | 2.25                     | (1.52 - 3.33) |
| 65-74 years                    | 1.72                        | (1.64 - 1.81) | 2.39            | (2.05 - 2.80) | 7.12                     | (4.89 - 10.4) |
| 75-84 years                    | 2.57                        | (2.44 - 2.70) | 4.23            | (3.61 - 4.96) | 24.7                     | (17.1 - 35.7) |
| 85 years and over              | 3.40                        | (3.20 - 3.61) | 7.64            | (6.35 - 9.18) | 49.2                     | (33.7 - 71.6) |
| Sex                            |                             |               |                 |               |                          |               |
| Males                          | 1.00                        | (ref)         | 1.00            | (ref)         | 1.00                     | (ref)         |
| Females                        | 0.72                        | (0.70 - 0.74) | 0.42            | (0.39 - 0.46) | 1.36                     | (1.21 - 1.53) |
| Highest level of education     |                             |               |                 |               |                          |               |
| Did not complete high school   | 1.00                        | (ref)         | 1.00            | (ref)         | 1.00                     | (ref)         |
| High school or equivalent      | 0.93                        | (0.91 - 0.96) | 0.92            | (0.85 - 0.99) | 1.02                     | (0.91 - 1.15) |
| University or higher           | 0.86                        | (0.83 - 0.90) | 0.78            | (0.69 - 0.88) | 1.16                     | (0.98 - 1.38) |
| Unknown / missing              | 1.13                        | (1.07 - 1.20) | 0.95            | (0.77 - 1.16) | 0.90                     | (0.68 - 1.18) |
| Marital status                 |                             |               |                 |               |                          |               |
| Single                         | 1.00                        | (ref)         | 1.00            | (ref)         | 1.00                     | (ref)         |
| Married / partnered            | 1.19                        | (1.13 - 1.25) | 1.09            | (0.93 - 1.28) | 1.31                     | (1.05 - 1.63) |
| Widowed / divorced / separated | 1.17                        | (1.13 - 1.20) | 1.19            | (1.10 - 1.30) | 1.14                     | (1.01 - 1.28) |
| Unknown / missing              | 1.22                        | (1.08 - 1.37) | 0.79            | (0.50 - 1.25) | 0.57                     | (0.25 - 1.29) |
| Annual household income        |                             |               |                 |               |                          |               |
| <\$10,000                      | 1.00                        | (ref)         | 1.00            | (ref)         | 1.00                     | (ref)         |
| \$10,000 - \$29,999            | 0.89                        | (0.86 - 0.92) | 0.87            | (0.76 - 0.99) | 1.04                     | (0.87 - 1.25) |
| \$30,000 - \$49,000            | 0.80                        | (0.76 - 0.84) | 0.89            | (0.76 - 1.04) | 0.80                     | (0.62 - 1.02) |
| \$50,000 - \$69,999            | 0.75                        | (0.70 - 0.80) | 0.85            | (0.70 - 1.03) | 0.88                     | (0.63 - 1.21) |
| \$70,000 or more               | 0.65                        | (0.61 - 0.69) | 0.75            | (0.62 - 0.90) | 0.85                     | (0.63 - 1.16) |
| Not specified                  | 0.94                        | (0.90 - 0.98) | 1.04            | (0.90 - 1.20) | 1.05                     | (0.86 - 1.28) |
| Unknown / missing              | 1.13                        | (1.07 - 1.18) | 1.14            | (0.97 - 1.34) | 1.15                     | (0.93 - 1.43) |
| Employment status              |                             |               |                 |               |                          |               |
| Not working                    | 1.00                        | (ref)         | 1.00            | (ref)         | 1.00                     | (ref)         |
| Part time                      | 0.82                        | (0.79 - 0.86) | 0.90            | (0.78 - 1.04) | 0.63                     | (0.47 - 0.84) |
| Full time                      | 0.84                        | (0.80 - 0.88) | 1.16            | (1.01 - 1.33) | 0.90                     | (0.67 - 1.19) |
| Missing / unknown              | 0.93                        | (0.85 - 1.01) | 1.03            | (0.78 - 1.38) | 0.91                     | (0.64 - 1.28) |
| Language spoken at home        |                             |               |                 |               |                          |               |
| English                        | 1.00                        | (ref)         | 1.00            | (ref)         | 1.00                     | (ref)         |
| Other                          | 0.92                        | (0.88 - 0.96) | 0.99            | (0.87 - 1.12) | 1.04                     | (0.88 - 1.23) |
| Health insurance status        |                             |               |                 |               |                          |               |
| Private with extras            | 1.00                        | (ref)         | 1.00            | (ref)         | 1.00                     | (ref)         |
| Private, no extras             | 1.03                        | (0.99 - 1.08) | 1.05            | (0.93 - 1.18) | 0.93                     | (0.79 - 1.09) |
| Department of Veterans Affairs | 1.28                        | (1.21 - 1.36) | 1.08            | (0.91 - 1.28) | 1.11                     | (0.91 - 1.35) |
| Health Care Card               | 1.60                        | (1.54 - 1.65) | 1.42            | (1.29 - 1.57) | 0.94                     | (0.82 - 1.08) |

|                                                 | Preventable hospitalisation |               | AMI (emergency) |               | Hip fracture (emergency) |               |
|-------------------------------------------------|-----------------------------|---------------|-----------------|---------------|--------------------------|---------------|
|                                                 | IRR                         | (95% CIs)     | IRR             | (95% CIs)     | IRR                      | (95% CIs)     |
| None                                            | 1.50                        | (1.44 - 1.55) | 1.26            | (1.13 - 1.41) | 0.93                     | (0.78 - 1.10) |
| Number of people can depend on                  |                             |               |                 |               |                          |               |
| 0 people                                        | 1.00                        | (ref)         | 1.00            | (ref)         | 1.00                     | (ref)         |
| 1-4 people                                      | 1.09                        | (1.04 - 1.14) | 0.92            | (0.80 - 1.06) | 1.20                     | (0.96 - 1.49) |
| 5-10 people                                     | 1.07                        | (1.02 - 1.12) | 0.92            | (0.80 - 1.07) | 1.18                     | (0.94 - 1.47) |
| 11 or more people                               | 1.20                        | (1.14 - 1.27) | 0.89            | (0.75 - 1.06) | 1.15                     | (0.89 - 1.50) |
| Unknown / missing                               | 1.16                        | (1.10 - 1.24) | 0.99            | (0.82 - 1.20) | 1.35                     | (1.04 - 1.77) |
| Positive health seeking behaviours <sup>a</sup> |                             |               |                 |               |                          |               |
| 0 health behaviours                             | 0.96                        | (0.86 - 1.07) | 1.02            | (0.72 - 1.43) | 1.31                     | (0.77 - 2.23) |
| 1 health behaviour                              | 1.00                        | (ref)         | 1.00            | (ref)         | 1.00                     | (ref)         |
| 2 health behaviours                             | 0.89                        | (0.86 - 0.93) | 0.89            | (0.80 - 1.00) | 0.76                     | (0.65 - 0.89) |
| 3 health behaviours                             | 0.78                        | (0.75 - 0.81) | 0.76            | (0.68 - 0.85) | 0.65                     | (0.55 - 0.77) |
| 4 health behaviours                             | 0.76                        | (0.72 - 0.80) | 0.75            | (0.64 - 0.88) | 0.55                     | (0.43 - 0.70) |
| BMI                                             |                             |               |                 |               |                          |               |
| Underweight                                     | 1.13                        | (1.08 - 1.17) | 1.01            | (0.88 - 1.15) | 1.10                     | (0.96 - 1.27) |
| Healthy weight                                  | 1.00                        | (ref)         | 1.00            | (ref)         | 1.00                     | (ref)         |
| Overweight                                      | 0.94                        | (0.91 - 0.97) | 0.95            | (0.87 - 1.03) | 0.57                     | (0.50 - 0.64) |
| Obese                                           | 1.00                        | (0.96 - 1.03) | 1.00            | (0.90 - 1.10) | 0.35                     | (0.29 - 0.42) |
| Unknown / missing                               | 1.20                        | (1.10 - 1.32) | 1.10            | (0.80 - 1.50) | 0.69                     | (0.41 - 1.16) |
| Self-rated health                               |                             |               |                 |               |                          |               |
| Excellent                                       | 1.00                        | (ref)         | 1.00            | (ref)         | 1.00                     | (ref)         |
| Very good                                       | 1.22                        | (1.13 - 1.30) | 1.21            | (1.03 - 1.43) | 0.86                     | (0.67 - 1.10) |
| Good                                            | 1.60                        | (1.50 - 1.71) | 1.32            | (1.12 - 1.55) | 1.04                     | (0.81 - 1.33) |
| Fair                                            | 2.58                        | (2.40 - 2.76) | 1.59            | (1.33 - 1.90) | 1.18                     | (0.91 - 1.54) |
| Poor                                            | 4.10                        | (3.79 - 4.43) | 1.84            | (1.47 - 2.32) | 1.66                     | (1.20 - 2.29) |
| Unknown / missing                               | 2.27                        | (2.09 - 2.46) | 1.37            | (1.09 - 1.72) | 1.04                     | (0.77 - 1.42) |
| Multi-morbid conditions <sup>b</sup>            |                             |               |                 |               |                          |               |
| No conditions                                   | 1.00                        | (ref)         | 1.00            | (ref)         | 1.00                     | (ref)         |
| 1 condition                                     | 1.35                        | (1.31 - 1.40) | 1.20            | (1.09 - 1.32) | 1.00                     | (0.87 - 1.14) |
| 2 conditions                                    | 1.98                        | (1.91 - 2.05) | 1.45            | (1.30 - 1.62) | 0.90                     | (0.77 - 1.05) |
| 3 or more conditions                            | 2.71                        | (2.60 - 2.82) | 2.26            | (2.01 - 2.55) | 1.06                     | (0.90 - 1.26) |
| Functional limitations <sup>c</sup>             |                             |               |                 |               |                          |               |
| No limitation                                   | 1.00                        | (ref)         | 1.00            | (ref)         | 1.00                     | (ref)         |
| Minor limitations                               | 1.04                        | (0.97 - 1.10) | 0.97            | (0.84 - 1.14) | 0.83                     | (0.60 - 1.16) |
| Mild limitation                                 | 1.25                        | (1.18 - 1.32) | 1.04            | (0.91 - 1.19) | 1.13                     | (0.86 - 1.48) |
| Moderate limitation                             | 1.56                        | (1.48 - 1.64) | 1.17            | (1.03 - 1.34) | 1.86                     | (1.45 - 2.38) |
| Severe limitation                               | 2.36                        | (2.24 - 2.48) | 1.49            | (1.30 - 1.71) | 2.83                     | (2.21 - 3.63) |
| Unknown / missing                               | 1.71                        | (1.61 - 1.80) | 1.24            | (1.07 - 1.44) | 1.75                     | (1.36 - 2.26) |
| Psychological distress <sup>d</sup>             |                             |               |                 |               |                          |               |
| Low distress                                    | 1.00                        | (ref)         | 1.00            | (ref)         | 1.00                     | (ref)         |
| Moderate distress                               | 1.03                        | (0.99 - 1.06) | 1.01            | (0.91 - 1.12) | 1.03                     | (0.88 - 1.20) |
| High distress                                   | 0.99                        | (0.95 - 1.03) | 1.08            | (0.92 - 1.26) | 1.10                     | (0.87 - 1.39) |
| Very high distress                              | 0.99                        | (0.94 - 1.06) | 0.88            | (0.69 - 1.12) | 1.18                     | (0.83 - 1.66) |
| Unknown / missing                               | 1.09                        | (1.03 - 1.15) | 1.31            | (1.12 - 1.54) | 1.16                     | (0.95 - 1.42) |
| <b>Area-level factors</b>                       |                             |               |                 |               |                          |               |
| Remoteness of residence                         |                             |               |                 |               |                          |               |

|                                          | Preventable hospitalisation |               | AMI (emergency) |               | Hip fracture (emergency) |               |
|------------------------------------------|-----------------------------|---------------|-----------------|---------------|--------------------------|---------------|
|                                          | IRR                         | (95% CIs)     | IRR             | (95% CIs)     | IRR                      | (95% CIs)     |
| Major city                               | 1.00                        | (ref)         | 1.00            | (ref)         | 1.00                     | (ref)         |
| Inner regional                           | 0.95                        | (0.88 - 1.02) | 1.05            | (0.91 - 1.22) | 1.13                     | (0.95 - 1.33) |
| Outer regional                           | 1.01                        | (0.88 - 1.15) | 1.08            | (0.87 - 1.34) | 1.06                     | (0.81 - 1.38) |
| Remote / very remote                     | 1.24                        | (0.97 - 1.58) | 0.95            | (0.61 - 1.48) | 0.84                     | (0.44 - 1.62) |
| <b>Full-time workload equivalent GPs</b> |                             |               |                 |               |                          |               |
| Quintile 1 (2.64-6.90 GPs)               | 1.00                        | (ref)         | 1.00            | (ref)         | 1.00                     | (ref)         |
| Quintile 2 (6.91-7.60 GPs)               | 0.89                        | (0.78 - 1.02) | 0.88            | (0.73 - 1.07) | 1.01                     | (0.80 - 1.29) |
| Quintile 3 (7.63-8.64 GPs)               | 0.95                        | (0.84 - 1.08) | 0.89            | (0.74 - 1.08) | 1.10                     | (0.87 - 1.39) |
| Quintile 4 (8.65-9.94 GPs)               | 0.92                        | (0.79 - 1.06) | 0.88            | (0.72 - 1.07) | 1.04                     | (0.82 - 1.32) |
| Quintile 5 (9.95-13.3 GPs)               | 1.02                        | (0.87 - 1.19) | 0.91            | (0.74 - 1.12) | 0.96                     | (0.74 - 1.23) |
| <b>Hospital-level factors</b>            |                             |               |                 |               |                          |               |
| <b>Hospital category</b>                 |                             |               |                 |               |                          |               |
| Principal                                | 1.00                        | (ref)         | 1.00            | (ref)         | 1.00                     | (ref)         |
| Major metropolitan                       | 0.99                        | (0.95 - 1.03) | 1.02            | (0.99 - 1.05) | 1.02                     | (0.99 - 1.05) |
| Major non-metropolitan                   | 1.01                        | (0.97 - 1.04) | 1.04            | (1.02 - 1.07) | 0.99                     | (0.96 - 1.02) |
| District                                 | 1.02                        | (0.99 - 1.06) | 1.00            | (0.97 - 1.03) | 0.99                     | (0.96 - 1.02) |
| Community                                | 1.06                        | (1.02 - 1.10) | 0.97            | (0.93 - 1.01) | 0.96                     | (0.91 - 1.01) |
| Multipurpose                             | 1.05                        | (1.01 - 1.09) | 0.93            | (0.88 - 0.99) | 1.02                     | (0.94 - 1.09) |
| <b>Random effects</b>                    |                             |               |                 |               |                          |               |
| <b>Residual random effect (SE)</b>       |                             |               |                 |               |                          |               |
| Hospital-level                           | 0.276                       | (0.056)       | 0.010           | (0.013)       | 0.024                    | (0.022)       |
| Area-level                               | 0.061                       | (0.011)       | 0.050           | (0.015)       | 0.013                    | (0.011)       |

<sup>a</sup> Healthy behaviours, of non-smoking status, safe level of alcohol consumption (<14 drinks per week), at least 2.5 hours of intensity-weighted physical activity per week, and meeting dietary guidelines for daily fruit (2 serves) and vegetable (5 serves) consumption

<sup>b</sup> Of self-reported heart disease, high blood pressure, stroke, diabetes, blood clot, asthma, Parkinson's disease, and any cancer except skin cancer.

<sup>c</sup> Measured using the Medical Outcome Study physical functioning scale.

<sup>d</sup> Measured using the K10 scale.

# BMJ Open

## Do hospitals influence geographic variation in admission for preventable hospitalisation? A data linkage study in New South Wales, Australia

|                                 |                                                                                                                                                                                                                                                                             |
|---------------------------------|-----------------------------------------------------------------------------------------------------------------------------------------------------------------------------------------------------------------------------------------------------------------------------|
| Journal:                        | <i>BMJ Open</i>                                                                                                                                                                                                                                                             |
| Manuscript ID                   | bmjopen-2018-027639.R1                                                                                                                                                                                                                                                      |
| Article Type:                   | Research                                                                                                                                                                                                                                                                    |
| Date Submitted by the Author:   | 17-Dec-2018                                                                                                                                                                                                                                                                 |
| Complete List of Authors:       | Falster, Michael; University of New South Wales, Centre for Big Data Research in Health<br>Leyland, Alastair; MRC/CSO Social and Public Health Sciences Unit, University of Glasgow,<br>Jorm, Louisa; University of New South Wales, Centre for Big Data Research in Health |
| <b>Primary Subject Heading</b>: | Health services research                                                                                                                                                                                                                                                    |
| Secondary Subject Heading:      | Epidemiology                                                                                                                                                                                                                                                                |
| Keywords:                       | PRIMARY CARE, Preventable hospitalisations, Ambulatory care sensitive conditions, Multilevel modelling                                                                                                                                                                      |
|                                 |                                                                                                                                                                                                                                                                             |

SCHOLARONE™  
Manuscripts



## Title

Do hospitals influence geographic variation in admission for preventable hospitalisation? A data linkage study in New South Wales, Australia

## Authors

Michael O Falster, PhD<sup>1</sup>; Alastair H Leyland, PhD<sup>2</sup>; Louisa R Jorm, PhD<sup>1</sup>;

<sup>1</sup> Centre for Big Data Research in Health, UNSW Sydney, Australia

<sup>2</sup> MRC/CSO Social and Public Health Sciences Unit, University of Glasgow, Glasgow UK

## Corresponding author

Dr Michael O. Falster

Centre for Big Data Research in Health, UNSW Sydney

Level 1, AGSM Building (G27), UNSW

Sydney NSW 2052, Australia

+61 (2) 9385 0698

[m.falster@unsw.edu.au](mailto:m.falster@unsw.edu.au)

## Abstract

**Objective:** Preventable hospitalisations are used internationally as a performance indicator for primary care, but the influence of other health system factors remains poorly understood. This study investigated between-hospital variation in rates of preventable hospitalisation.

**Setting:** Linked health survey and hospital admissions data for a cohort study of 266,826 people aged over 45 years in the state of New South Wales, Australia.

**Method:** Between-hospital variation in preventable hospitalisation was quantified using cross-classified multiple-membership multilevel Poisson models, adjusted for personal sociodemographic, health and area-level contextual characteristics. Variation was also explored for two conditions unlikely to be influenced by discretionary admission practice: emergency admissions for acute myocardial infarction (AMI) and hip fracture.

**Results:** We found significant between-hospital variation in adjusted rates of preventable hospitalisation, with hospitals varying on average 26% from the state mean. Patients served more by community and multipurpose facilities (smaller facilities primarily in rural areas) had higher rates of preventable hospitalisation. Community hospitals had the greatest between-hospital variation, and included the facilities with the highest rates of preventable hospitalisation. There was comparatively little between-hospital variation in rates of admission for AMI and hip fracture.

**Conclusions:** Geographic variation in preventable hospitalisation is determined in part by hospitals, reflecting different roles played by community and multipurpose facilities, compared with major and principal referral hospitals, within the community. Care should be taken when interpreting the indicator simply as a performance measure for primary care.

## Strengths and limitations of the study:

- The use of novel cross-classified multiple membership multilevel models makes this the first study on preventable hospitalisations to have modelled each of patient-, area- and hospital-level effects.
- The use of a large cohort with detailed survey and linked health data allowed adjustment for a large range of patient confounders.
- We had limited data on hospital characteristics and accessibility of primary care
- The study population may not be representative of the Australian population, being an older cohort (age 45 and over) with a low response rate.

## Introduction

Preventable hospitalisations are an intuitive, yet contentious, performance indicator for primary care. Also known as hospital admissions for ambulatory care sensitive conditions, rates of preventable hospitalisations are used in Australia<sup>1 2</sup> and internationally as a measure of hospital use that could potentially be prevented through timely and effective access to primary care. These admissions are estimated to cost over \$30 billion dollars annually in the US,<sup>3</sup> presenting significant potential cost savings to the healthcare system. However, rates of preventable hospitalisation in Australia have not declined, despite accounting for 6% of all hospitalisations and being a national performance indicator for over 10 years.<sup>4</sup>

Health system performance measures should be underpinned by strong evidence that improvements will lead to improvements in health outcomes,<sup>5</sup> and the utility of preventable hospitalisations as a performance measure has been challenged accordingly.<sup>6</sup> Initially developed in the US where large variations in income, workforce and health insurance coverage result in stark disparities in access to primary care,<sup>7 8</sup> the subsequent adoption of the indicator in various international settings has produced a mixed evidence base, particularly in countries with a universal health care system such as Australia<sup>9</sup>, Canada<sup>10 11</sup> and the UK.<sup>6</sup> The utility of the indicator is likely to differ according to the characteristics of the patient population, and the barriers and facilitators to accessing care in the health system.

One health system factor which remains poorly understood is the role of hospitals. Differences in a hospital's propensity to admit patients can arise from physician preferences<sup>12</sup> and in-hospital capacity.<sup>7 13 14</sup> Anecdotal reports from the UK suggest that hospitals play a direct role in choosing to admit patients for observation, such as in regional areas where long travel times and limited clinical support can lead to more cautious admission thresholds.<sup>15</sup> Australia has a vast geography, and in remote areas hospitals and emergency departments may be used as a substitute for GP care.<sup>16</sup> However evidence on hospitals' influence on preventable hospitalisations is limited: higher rates have been reported in UK hospitals that convert more emergency department presentations into admissions,<sup>17</sup> and in areas in the US with more hospital beds per capita<sup>18</sup> – although the latter finding has been inconsistent.<sup>19 20</sup>

A better understanding of the role of hospitals would improve our understanding of the limitations of preventable hospitalisations as an indicator of primary care. We sought to quantify between-hospital variation in preventable hospitalisation in New South Wales (NSW), Australia, and assess if this variation differs between categories of hospital facilities.

## Methods

### *Study population*

This observational study included participants in The Sax Institute's 45 and Up Study, a prospective cohort of 267,014 residents of NSW, Australia, aged 45 and over.<sup>21</sup> Eligible participants were randomly selected between 2006-2009 through the Department of Human Services enrolment database. At study entry participants completed a detailed questionnaire containing information on their health and sociodemographic characteristics, and provided informed consent for long-term follow-up, including linkage with administrative health data sets, and use of their data for research purposes.

1  
2  
3 For each participant, linked data on hospital admissions (between 2000-2011) and deaths (between  
4 2006-2011) were obtained from the NSW Admitted Patient Data Collection and the NSW Registry of  
5 Births Deaths and Marriages mortality data file, respectively. Data linkage was performed  
6 probabilistically by the NSW Centre for Health Record Linkage (<http://www.cherel.org.au/>).  
7 Participants were excluded if they had an unknown age, area of residence, or inconsistent records  
8 suggesting incorrect linkage (e.g. death before date of study entry).  
9

10  
11  
12 Ethics approval for the 45 and Up Study was given by the University of New South Wales Human  
13 Research Ethics Committee, and ethics approval for this study was given by the NSW Population and  
14 Health Services Research Ethics Committee and the University of Western Sydney Research Ethics  
15 Committee. All analyses were carried out in accordance with these approvals.  
16

### 17 *Hospitalisations, outcomes and exposures*

18  
19 Hospital outcomes were identified using the linked hospital admissions data, from the time of  
20 participants' entry into the study (between 2006-2009) until death or the end of linked data  
21 (31/12/2011), whichever came first. Hospital admissions were restricted to public hospitals only.  
22 Transfers and changes in type of care (e.g. from acute to palliative) within a hospital were  
23 considered a continuation of the same episode of care.  
24

25  
26 Preventable hospitalisations were identified according to the 'selected potentially preventable  
27 hospitalisations' performance indicator in the Australian National Healthcare Agreement.<sup>22</sup> The  
28 indicator is a composite measure of hospital admissions for 21 conditions, including a selection of  
29 chronic conditions (e.g. diabetes complications, angina, chronic obstructive pulmonary disease),  
30 acute conditions (e.g. dehydration and gastroenteritis, pyelonephritis, cellulitis) and vaccine-  
31 preventable conditions (e.g. influenza and pneumonia). Two additional outcome measures, for  
32 which hospital admission was unlikely to be influenced by discretionary patterns of care, were used  
33 for comparison: emergency admissions for acute myocardial infarction (AMI) and hip fracture.<sup>14</sup>  
34 Hospital diagnosis and procedure codes used to identify outcomes are in Appendix 1. Sensitivity  
35 analyses tested a recently suggested modification to the preventable hospitalisations indicator,  
36 categorising preventable hospitalisations as short ( $\leq 2$  days length of stay [LOS]) and long (3+ days  
37 LOS), on the basis that shorter admissions may be more amenable to primary prevention.<sup>23</sup>  
38

39  
40 All person-level information was derived from the self-reported survey completed at study entry,  
41 including participants' age, sex, education, marital status, annual household income, employment,  
42 language spoken at home, health insurance status, level of social support, body mass index, healthy  
43 behaviours, multi-morbidity, functional limitation, self-rated health and psychological distress. These  
44 variables reflect patients' predisposition and need to use health services, with most previously found  
45 to be associated with preventable hospitalisation.<sup>9</sup> All variables were treated as categorical, with  
46 missing values as an additional category.<sup>9</sup>  
47

48  
49 Area-level information was assigned according to the Statistical Local Area (SLA) of patient  
50 residence: geographic remoteness used the Accessibility/Remoteness Index of Australia, and the  
51 effective supply of full-time workload equivalent (FWE) general practitioners (GPs). FWE GPs were  
52 derived from aggregated Medicare claims data,<sup>9,24</sup> as the number of claims for GP services for  
53 residents of each SLA, divided by the average number of claims per FWE GP in NSW. Population  
54 estimates were used to calculate the density of FWE GPs per 10,000 residents of each SLA, and  
55 divided into quintiles.  
56  
57  
58  
59  
60

1  
2  
3 Hospital category was classified according to hospital peer group, a categorisation used for  
4 benchmarking and reporting that groups hospitals by the types of services provided.<sup>25</sup> For this  
5 analysis, peer groups were collapsed into six broad categories reflecting major differences in the  
6 size, role and location of hospitals: principal (>25,000 acute separations per annum), major  
7 metropolitan (10-25,000 acute separations per annum), major non-metropolitan (10,000+ acute  
8 separations per annum, in rural areas), district (2-10,000 acute separations per annum), community  
9 (<2,000 acute separations per annum) and multipurpose (smaller facilities providing integrated  
10 acute health, nursing home, hostel, community health, aged care and non-specialised sub-acute  
11 services) (detailed definitions in Appendix 2). Australia has a vast geography with most high-volume  
12 facilities located in metropolitan and inner regional areas. The smaller community and multipurpose  
13 facilities provide a mix of acute and sub-acute care, with multipurpose able to provide a range of  
14 integrated care services as negotiated between government, health practitioners and the  
15 community.  
16  
17  
18  
19

### 20 *Statistical methods*

21  
22 Between-hospital variation in admission was analysed using cross-classified multiple membership  
23 multilevel Poisson models.<sup>26</sup> All models used number of hospitalisations as the outcome and log of  
24 the follow up time as an offset, so as to model 'rates' of admission, and were adjusted for  
25 participants' sociodemographic and health characteristics, geographic remoteness and supply of GP  
26 services in their area of residence, so the remaining residual variation was that potentially  
27 attributable to hospitals.  
28  
29

30  
31 Multilevel models allow for variation to be partitioned to various 'levels' for analysis, and these  
32 models clustered study participants in both their geographic area of residence (SLA) and all potential  
33 hospitals of admission. Because a patient could be admitted to any number of hospitals, this  
34 clustering was performed using weighted hospital service area networks of all public hospitals  
35 servicing the population.<sup>26</sup> Weighting was determined by patterns of patient flow for all-cause  
36 admissions at the level of the postal-area.  
37  
38

39  
40 From these models, hospital-level incidence rate ratios (IRRs) were derived – the admission rate for  
41 the hospital relative to the state average rate, taking into account the factors in the model, as well as  
42 the size of the hospital's population.<sup>27</sup> The variation between hospital IRRs was measured using the  
43 random intercept variance ( $\sigma^2$ ) from the multilevel model, as well as the average relative deviation  
44 (ARD) which quantifies, on average, how much these adjusted hospitalisation rates differ from the  
45 statewide adjusted admission rate.<sup>28</sup>  
46  
47

48  
49 Overall IRRs for hospital types were derived by adding parameters for each hospital type in the  
50 model. Given the multiple membership structure, the parameters were calculated as the proportion  
51 of hospital services provided by each hospital type in the patient's postal-area. Each parameter was  
52 centred on the mean group value, and scaled so a single unit increase represents a 10% increase in  
53 service provision. All analyses were performed in SAS9.4 and MLwiN v2.35.  
54

### 55 *Patient and public involvement*

56  
57 Participants in the 45 and Up Study completed a baseline questionnaire and have provided informed  
58 consent for the use of their data for research purposes. However, patients and the public were not  
59 involved in the design of this study.  
60

## Results

Of 267,014 participants in the linked dataset, n=119 were excluded because they had unknown area of residence or incompatible dates in the linked data. Participants in 16 postal areas did not have any hospitalizations during follow-up; the 69 participants residing in these areas were excluded, leaving 266,826 for analysis, over an average follow-up of 3.7 years. Mean age, self-reported health and multi-morbidity of study participants were broadly consistent across remoteness categories (Table 1), although participants in remote areas were slightly younger, with poorer health and a higher number of comorbidities. Patients were admitted to a total of 259 different facilities, including n=17 principal referral, n=12 major metropolitan, n=12 major non-metropolitan, n=38 district, n=70 community and n=110 multi-disciplinary facilities.

The majority of the 30,264 preventable hospitalisations during follow-up were to principal hospitals (31%) with only a small proportion to community (9.1%) and multipurpose (2.6%) facilities (Table 1). However, this pattern was inverted for participants in remote and outer regional areas, with the majority of admissions to community (24.6%) and district hospitals (37.4%). A similar pattern was observed in the 3,167 emergency AMI and 1,550 emergency hip fracture admissions, although with a smaller proportion of admissions overall to district, community and multipurpose hospitals (data not shown).

There was significant between-hospital variation in preventable hospitalisation, such that each hospital deviated on average 26% from the mean adjusted rate of admission ( $\sigma^2=0.312$ ; standard error [SE]=0.059; ARD=25.6). This variation was much less pronounced for emergency admissions for AMI ( $\sigma^2=0.047$ ; SE=0.026; ARD=9.6) and was not significant for hip fracture ( $\sigma^2=0.015$ ; SE=0.017; ARD=2.9)

Figure 1 shows hospital-level IRRs from the multilevel model, which indicate how each hospital differs from the state average, after adjusting for patient and geographic factors. There was considerable variation in preventable hospitalisation, with 7% of hospitals having significantly higher or lower than average adjusted rates of admission. When stratified by category of hospital, the greatest variation was seen in community and district hospitals, with community hospitals in particular having the highest rates of preventable hospitalisation – up to 4 times the average rate of admission. There were no hospitals with significant deviations from the mean for emergency AMI or hip fracture admissions.

ARDs stratified by hospital category (Figure 1) corroborated these results, with community hospitals having the highest levels of variation in preventable hospitalisation (average 36% difference from the mean), and principal hospitals varying the least (average 21% difference from the mean). There was less variation between all hospital types for emergency AMI or hip fracture admissions than preventable hospitalisations,.

The inclusion of hospital category in the regression models (Table 2) showed significantly higher rates of preventable hospitalisations among people serviced by community (IRR:1.06; 95% CIs:1.02-1.10) and multipurpose (IRR:1.05; 95% CIs:1.01-1.09) than principal hospitals. For emergency AMI admissions, there were significantly higher rates in people serviced by major non-metropolitan (IRR:1.04; 95% CIs:1.02-1.07), and lower rates among people serviced by multipurpose facilities (IRR:0.93; 95% CIs:0.88-0.99). IRRs for all variables in the model are provided in Appendix 3.



1  
2  
3 A sensitivity analysis categorising length of stay (Table 3) found more the majority of preventable  
4 hospitalisations (n=16,305, 53.9%) were short stay admissions (0-2 day LOS), with the remainder  
5 (n=13,959, 46.1%) having a LOS of three days or more. There were differing patterns of variation by  
6 length of stay, with the significantly higher rates of admission for community and multipurpose  
7 hospitals restricted to short-stay preventable hospitalisations only.  
8  
9

## 10 Discussion

11 We found significant variation in rates of preventable hospitalisation between public hospitals, even  
12 after adjustment for patient and geographic factors. Our finding was most marked for community  
13 and multipurpose hospitals – smaller facilities which provide the majority of services to patients  
14 living in regional and remote communities. Given similar variation was not observed for other less-  
15 discretionary conditions, major hospitals servicing regional areas, or for admissions with a longer  
16 length of stay, our findings indicate a varying propensity to admit patients for preventable  
17 hospitalisation among and between categories of hospital facilities.  
18  
19

20 Our findings do not suggest that preventable hospitalisations should be used as indicator of  
21 discretionary admission practice – the effect size was modest and, consistent with prior research,  
22 the strongest predictors of admission were patient sociodemographic and health characteristics.<sup>9</sup>  
23 But while admissions to community and multipurpose hospitals represented only a small proportion  
24 (12%) of all preventable hospitalisations, they made up 55% of admissions in remote areas of  
25 Australia, where there is both high variability - with over a five-fold variation in rates of preventable  
26 hospitalisations<sup>2</sup> - and also the highest rates of admission.<sup>1,2</sup> Accordingly, these differences in  
27 admission practices are likely to play an important role in driving geographic variation in the  
28 preventable hospitalisations performance indicator. The implications for performance measurement  
29 are clear: interpretation of the indicator is complex and factors along the care continuum, including  
30 hospitals' propensity to admit, influence variation in admission rates.  
31  
32

33 There is very little existing evidence about how admissions for preventable hospitalisations vary  
34 between hospitals in Australia. One study of major hospitals in NSW reported up to 11-fold and 7-  
35 fold variation between hospitals in the proportion of admissions that were for congestive heart  
36 failure and chronic obstructive pulmonary disease respectively,<sup>29</sup> and earlier work from the current  
37 team found no association between preventable hospitalisations and hospital bed occupancy rates.<sup>26</sup>  
38 Importantly, these previous analyses (as with most hospital reporting) excluded community and  
39 multipurpose hospitals - the facilities in this study with the strongest patterns of variation. It is  
40 difficult to assess causes of between-hospital variation in the context of this analysis. Both  
41 differences in hospital roles (e.g. provision of both acute and sub-acute services) and differences in  
42 discretionary admission thresholds (e.g. admitting patients for observation to avoid long travel  
43 times<sup>15</sup>) could contribute, as well as the provision of community-based services such as hospital in  
44 the home<sup>30</sup>.  
45  
46

47 The preventable hospitalisations indicator is considered a measure of timely and effective access to  
48 primary care, and our findings are not inconsistent with this interpretation. Some of the variation in  
49 community and multipurpose hospitals is likely to reflect the facility acting as a substitute for  
50 primary care in areas where access is poor, and may arguably reflect either a deficiency of primary  
51 care or appropriate integration of services to meet population needs. We were unable to examine  
52 further dimensions of access, such as waiting times, distance to nearest GP clinic and type of in-  
53  
54  
55  
56  
57  
58  
59  
60

1  
2  
3 hospital practitioner, so were unable to further tease out these effects. However our results do  
4 suggest that use of the preventable hospitalisations indicator beyond its original intent—as a  
5 yardstick measure of health system performance<sup>7</sup>—needs to be approached with caution.  
6  
7

8 Our study is among a few internationally to provide evidence of a hospital-level difference in  
9 propensity to admit patients for preventable hospitalisations,<sup>17 18</sup> and is the first to quantify the  
10 extent of this variation. The findings, while not directly applicable to different health care settings,  
11 highlight the contextual differences between health systems which should be considered when  
12 adopting international performance indicators, as well as the need for localised policy responses  
13 tailored to models of care.  
14  
15

16 The key strength of this study is the use of a large cohort with detailed survey and linked health  
17 data. Much inference on preventable hospitalisation is limited either by unmeasured confounders or  
18 the use of ecological measures of patient demographics, and estimation of hospital effects can be  
19 difficult given the lack of a discrete population denominator. The use of cross-classified multiple  
20 membership multilevel models makes this the only study to perform appropriate modelling for each  
21 of patient-, area- and hospital-level effects. A limitation is that unexplained hospital variation  
22 remained, and we had only limited data on hospital characteristics, so the impact of more complex  
23 models of care, such as integrated care programs, has yet to be explored. The use of a population  
24 cohort meant further measures of morbidity derived from hospital admissions data (e.g. Charlson  
25 index) were not able to be utilised. Generalizability of our findings may also be limited given the  
26 older age (45 years and over) and low response rate (18%) of the study cohort, although the  
27 considerable size and heterogeneity of the study mean inferences from within-cohort comparisons  
28 remain valid.<sup>31</sup>  
29  
30  
31  
32  
33

## 34 Conclusion

35  
36 Geographic variation in rates of preventable hospitalisation is determined in part by the hospitals  
37 themselves, reflecting different roles of smaller and rural hospitals compared with major and  
38 principal referral hospitals to meet the needs of the community. International adoption of the  
39 preventable hospitalisations health performance indicator should consider the contextual barriers  
40 and facilitators to accessing care in the relevant health system. In Australia, care should be taken  
41 when interpreting preventable hospitalisations simply as a measure of accessibility and quality of  
42 primary care.  
43  
44  
45  
46  
47  
48  
49  
50  
51  
52  
53  
54  
55  
56  
57  
58  
59  
60



## Funding

This study was funded by a National Health and Medical Research Council Partnership Project Grant (#1036858) and by partner agencies the Australian Commission on Safety and Quality in Health Care, the Agency for Clinical Innovation and the NSW Bureau of Health Information. MF is supported by a National Health and Medical Research Council Early Career Fellowship (#1139133). AL receives funding from the Medical Research Council (MC\_UU\_12017/13) and the Scottish Government Chief Scientist Office (SPHSU13).

## Acknowledgements

The authors would like to thank Federico Girosi and the Australian Primary Health Care Research Institute at the Australian National University for assistance with the data. This research was completed using data collected through the 45 and Up Study ([www.saxinstitute.org.au](http://www.saxinstitute.org.au)). The 45 and Up Study is managed by the Sax Institute in collaboration with major partner Cancer Council NSW; and partners: National Heart Foundation of Australia (NSW Division); NSW Ministry of Health; NSW Government Family & Community Services – Ageing, Carers and the Disability Council NSW; and the Australian Red Cross Blood Service. We thank the many thousands of people participating in the 45 and Up Study. We thank the Sax Institute, the NSW Ministry of Health and the NSW Register of Births, Deaths and Marriages for allowing access to the data, and the Centre for Health Record Linkage for conducting the probabilistic linkage of records.

## Data availability

The data set used for this study was constructed from pre-existing source data sets (routinely collected data and the 45 and Up Study) with the permission from the custodians of each of these data sets and with specific ethical approval. The data set could potentially be made available to other researchers if they obtain the necessary approvals. Further information on this process can be obtained from the 45 and Up Study ([45andUp.research@saxinstitute.org.au](mailto:45andUp.research@saxinstitute.org.au)) and the NSW Centre for Health Record Linkage ([cherel.mail@moh.health.nsw.gov.au](mailto:cherel.mail@moh.health.nsw.gov.au)).

## Author contributions

MOF conceived the project, undertook the literature review, performed data analysis and drafted the manuscript. LRJ and AHL provided guidance and interpretation. All three authors edited, reviewed and approved the final manuscript. LRJ conceived the APHID study

## Competing interests

None declared

## References

1. Australian Commission on Safety and Quality in Health Care and Australian Institute of Health and Welfare. The Second Australian Atlas of Healthcare Variation. Sydney: ACSQHC; 2017.
2. National Health Performance Authority. Healthy Communities: Potentially preventable hospitalisations in 2013–14. Sydney: NHPA; 2015.
3. Torio CM, Elixhauser A, Andrews RM. Trends in potentially preventable hospital admissions among adults and children, 2005–2010. Rockville, MD: Agency for Healthcare Research and Quality, 2013.
4. Australian Institute of Health and Welfare. Admitted patient care 2014–15: Australian hospital statistics. Health services series no. 68. Cat. no. HSE 172. Canberra: AIHW; 2016
5. Baker DW, Chassin MR. Holding Providers Accountable for Health Care Outcomes. *Annals of internal medicine* 2017;167(6):418-23
6. Giuffrida A, Gravelle H, Roland M. Measuring quality of care with routine data: avoiding confusion between performance indicators and health outcomes. *Brit Med J* 1999;319(7202):94-98.
7. Billings J, Zeitel L, Lukomnik J, et al. Impact of socioeconomic status on hospital use in New York City. *Health Affairs (Project Hope)* 1993;12:162-73.
8. Weissman JS, Gatsonis C, Epstein AM. Rates of avoidable hospitalization by insurance status in Massachusetts and Maryland. *JAMA* 1992;268(17):2388-94
9. Falster MO, Jorm LR, Douglas KA, et al. Sociodemographic and health characteristics, rather than primary care supply, are major drivers of geographic variation in preventable hospitalizations in Australia. *Med Care* 2015;53(5):436-45.
10. Roos LL, Walld R, Uhanova J, et al. Physician visits, hospitalizations, and socioeconomic status: ambulatory care sensitive conditions in a canadian setting. *Health Serv Res* 2005;40:1167-85.
11. Trachtenberg AJ, Dik N, Chateau D, et al. Inequities in ambulatory care and the relationship between socioeconomic status and respiratory hospitalizations: a population-based study of a canadian city. *Annals of family medicine* 2014;12(5):402-7.
12. Dean NC, Jones JP, Aronsky D, et al. Hospital admission decision for patients with community-acquired pneumonia: variability among physicians in an emergency department. *Ann Emerg Med* 2012;59(1):35-41.
13. Fisher ES, Wennberg JE, Stukel TA, et al. Associations among hospital capacity, utilization, and mortality of US Medicare beneficiaries, controlling for sociodemographic factors. *Health Serv Res* 2000;34(6):1351-62.
14. Wennberg J, McPherson K, Goodman D. Small Area Analysis and the Challenge of Practice Variation. In: Johnson A, Stukel T, eds. *Medical Practice Variations*. Boston, MA: Springer US 2016:1-25.
15. Culliton G. Large variance in hospitals' 'propensity to admit'. *Irish Medical Times* 2016.
16. National Health Performance Authority. Healthy Communities: Use of emergency department and GP services in 2013-14. Sydney: NHPA, 2016.
17. O'Cathain A, Knowles E, Maheswaran R, et al. Hospital characteristics affecting potentially avoidable emergency admissions: national ecological study. *Health Services Management Research* 2013;26(4):110-8.
18. Zhan C, Miller MR, Wong H, et al. The effects of HMO penetration on preventable hospitalizations. *Health Serv Res* 2004;39(2):345-61.
19. Basu J, Friedman B, Burstin H. Primary care, HMO enrollment, and hospitalization for ambulatory care sensitive conditions: a new approach. *Med Care* 2002;40(12):1260-9.
20. Berlin C, Busato A, Rosemann T, et al. Avoidable hospitalizations in Switzerland: a small area analysis on regional variation, density of physicians, hospital supply and rurality. *BMC Health Serv Res* 2014;14(1):289.
21. Banks E, Redman S, Jorm L, et al. Cohort profile: the 45 and up study. *International Journal of Epidemiology* 2008;37(5):941-7.

- 1  
2  
3  
4  
5  
6  
7  
8  
9  
10  
11  
12  
13  
14  
15  
16  
17  
18  
19  
20  
21  
22  
23  
24  
25  
26  
27  
28  
29  
30  
31  
32  
33  
34  
35  
36  
37  
38  
39  
40  
41  
42  
43  
44  
45  
46  
47  
48  
49  
50  
51  
52  
53  
54  
55  
56  
57  
58  
59  
60
22. Australian Institute of Health and Welfare. National Healthcare Agreement: PI 22-Selected potentially preventable hospitalisations, 2012 2012 [Available from: <http://meteor.aihw.gov.au/content/index.phtml/itemId/443687> accessed 18/05/2012 2012.
  23. Swerissen H, Duckett S, Wright J. Chronic failure in primary care: Grattan Institute, 2016.
  24. Mazumdar S, Konings P, Butler D, et al. General practitioner (family physician) workforce in Australia: comparing geographic data from surveys, a mailing list and medicare. *BMC Health Serv Res* 2013;13(1):343.
  25. NSW Health. NSW Health Services Comparison Data Book 2008/2009. North Sydney, NSW: Demand and Performance Evaluation, NSW Health, 2010.
  26. Falster MO, Jorm LR, Leyland AH. Using Weighted Hospital Service Area Networks to Explore Variation in Preventable Hospitalization. *Health Serv Res* 2018;53 Suppl 1:3148-69.
  27. Merlo J, Chaix B, Yang M, et al. A brief conceptual tutorial of multilevel analysis in social epidemiology: linking the statistical concept of clustering to the idea of contextual phenomenon. *J Epidemiol Community Health* 2005;59(6):443-9.
  28. Tarkiainen L, Martikainen P, Laaksonen M, et al. Comparing the effects of neighbourhood characteristics on all-cause mortality using two hierarchical areal units in the capital region of Helsinki. *Health Place* 2010;16(2):409-12.
  29. Bureau for Health Information. Chronic disease care: A piece of the picture. Sydney: BHI, 2011.
  30. NSW Ministry of Health. Hospital in the Home Guideline. North Sydney: NSW Ministry of Health, 2013.
  31. Mealing NM, Banks E, Jorm LR, et al. Investigation of relative risk estimates from studies of the same population with contrasting response rates and designs. *BMC Medical Research Methodology* 2010;10:26.

## Tables and Figures

**Table 1: Cohort characteristics at baseline, and number of preventable hospitalisations during follow-up, by remoteness of area of residence**

|                                     | Total        | By remoteness category of residence |                |                |            |
|-------------------------------------|--------------|-------------------------------------|----------------|----------------|------------|
|                                     |              | Major cities                        | Inner regional | Outer regional | Remote     |
| <b>Cohort characteristics</b>       |              |                                     |                |                |            |
| N                                   | 266,826      | 119,496                             | 94,568         | 47,438         | 5,324      |
| Age (mean)                          | 62.7         | 63.4                                | 62.4           | 62.2           | 60.7       |
| Age (IQR)                           | 53.6-70.4    | 53.6-71.9                           | 53.8-69.7      | 53.7-69.4      | 52.0-67.8  |
| % Female                            | 53.6         | 52.4                                | 54.7           | 54.3           | 55.5       |
| % fair/poor self-rated health       | 13.7         | 13.9                                | 13.4           | 13.7           | 16.1       |
| % with >3 comorbidities             | 7.4          | 7.3                                 | 7.5            | 7.2            | 8.0        |
| <b>Preventable hospitalisations</b> |              |                                     |                |                |            |
| Number of admissions                | 30,264       | 12,512                              | 10,161         | 6,512          | 1,079      |
| Admissions to hospital type (%)     |              |                                     |                |                |            |
| - Principal                         | 9,398 (31.0) | 7,506 (60.0)                        | 1,600 (15.7)   | 255 (3.9)      | 37 (3.4)   |
| - Major metropolitan                | 4,172 (13.8) | 3,321 (26.5)                        | 787 (7.7)      | 61 (0.9)       | 3 (0.3)    |
| - Major non-metropolitan            | 6,443 (21.3) | 560 (4.5)                           | 3,933 (38.7)   | 1,872 (28.7)   | 78 (7.2)   |
| - District                          | 6,715 (22.2) | 804 (6.4)                           | 3,070 (30.2)   | 2,468 (37.9)   | 373 (34.6) |
| - Community                         | 2,760 (9.1)  | 278 (2.2)                           | 611 (6.1)      | 1,491 (22.9)   | 380 (35.2) |
| - Multipurpose                      | 776 (2.6)    | 43 (0.3)                            | 160 (1.6)      | 365 (5.6)      | 208 (19.3) |

**Table 2: Incidence rate ratio (IRR) of hospital category for preventable hospitalisation and emergency admissions for acute myocardial infarction (AMI) and hip fracture**

| Hospital category      | Preventable hospitalisations |               | AMI (emergency) |               | Hip fracture (emergency) |               |
|------------------------|------------------------------|---------------|-----------------|---------------|--------------------------|---------------|
|                        | IRR                          | (95% CIs)     | IRR             | (95% CIs)     | IRR                      | (95% CIs)     |
| Principal              | 1.00                         | (ref)         | 1.00            | (ref)         | 1.00                     | (ref)         |
| Major metropolitan     | 0.99                         | (0.95 – 1.03) | 1.02            | (0.99 – 1.05) | 1.02                     | (0.99 – 1.05) |
| Major non-metropolitan | 1.01                         | (0.97 – 1.04) | 1.04            | (1.02 – 1.07) | 0.99                     | (0.96 – 1.02) |
| District               | 1.02                         | (0.99 – 1.06) | 1.00            | (0.97 – 1.03) | 0.99                     | (0.96 – 1.02) |
| Community              | 1.06                         | (1.02 – 1.10) | 0.97            | (0.93 – 1.01) | 0.96                     | (0.91 – 1.01) |
| Multipurpose           | 1.05                         | (1.01 – 1.09) | 0.93            | (0.88 – 0.99) | 1.02                     | (0.94 – 1.09) |

**Table 3: Average relative deviation (ARD) and Incidence rate ratio (IRR) by hospital category for rates of preventable hospitalisation, separated as short-stay (0-2 days length of stay) and long-stay (>2 days length of stay) admissions**

| Hospital category      | Short stay<br>(0-2 days length of stay) |      |               | Long stay<br>(>2 days length of stay) |      |               |
|------------------------|-----------------------------------------|------|---------------|---------------------------------------|------|---------------|
|                        | ARD                                     | IRR  | (95% CIs)     | ARD                                   | IRR  | (95% CIs)     |
| Principal              | 17.9                                    | 1.00 | (ref)         | 14.6                                  | 1.00 | (ref)         |
| Major metropolitan     | 25.5                                    | 0.99 | (0.95 – 1.02) | 25.9                                  | 1.00 | (0.97 – 1.03) |
| Major non-metropolitan | 22.7                                    | 1.02 | (0.98 – 1.05) | 11.3                                  | 0.99 | (0.96 – 1.02) |
| District               | 30.4                                    | 1.02 | (0.99 – 1.05) | 24.3                                  | 0.98 | (0.95 – 1.00) |
| Community              | 17.5                                    | 1.04 | (1.01 – 1.07) | 25.7                                  | 1.02 | (0.99 – 1.05) |
| Multipurpose           | 24.3                                    | 1.04 | (1.00 – 1.08) | 11.6                                  | 0.99 | (0.95– 1.03)  |

1  
2  
3 *Figure 1: Hospital-specific incidence rate ratios from the mean adjusted rate of admission, for*  
4 *preventable hospitalisation and emergency admissions for acute myocardial infarction (AMI) and*  
5 *hip fracture, overall and stratified by hospital category*  
6  
7  
8

9  
10  
11  
12  
13  
14  
15  
16  
17  
18  
19  
20  
21  
22  
23  
24  
25  
26  
27  
28  
29  
30  
31  
32  
33  
34  
35  
36  
37  
38  
39  
40  
41  
42  
43  
44  
45  
46  
47  
48  
49  
50  
51  
52  
53  
54  
55  
56  
57  
58  
59  
60

ARD = average relative deviation. Red and blue markers indicate hospitals with significantly higher and lower rates of admission respectively. Adjusted for patient sociodemographic and health factors, remoteness and supply of GP services in area of residence

For peer review only

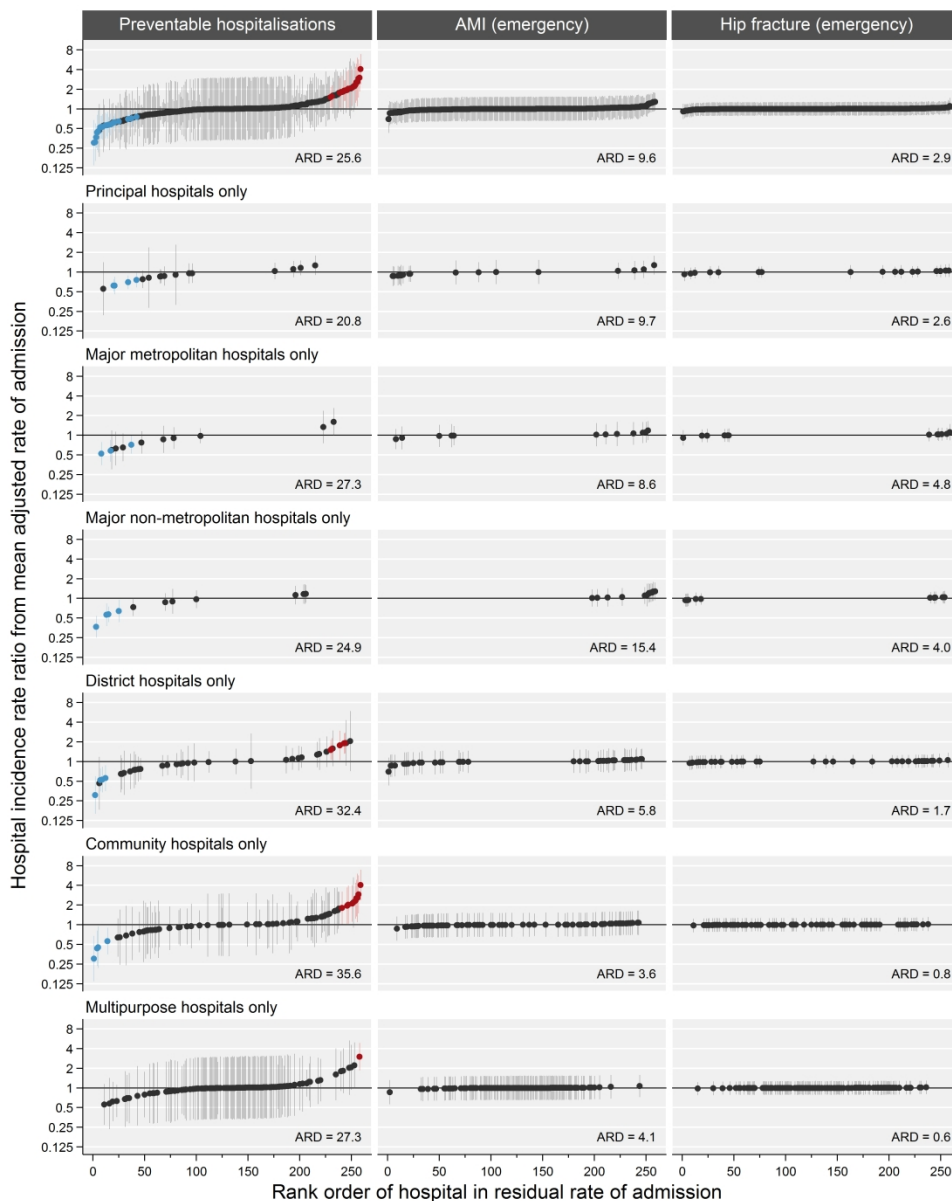

Hospital-specific incidence rate ratios from the mean adjusted rate of admission, for preventable hospitalisation and emergency admissions for acute myocardial infarction (AMI) and hip fracture, overall and stratified by hospital type

330x412mm (300 x 300 DPI)



## Online appendices

### Appendix 1:

ICD-10-AM codes for identifying hospital outcomes.

| Category                                     | ICD-10-AM diagnosis and procedure codes                                                                                                                                                                                                                                                                                                                                                                                                                                                                                                                                                                                                                                                                                                                                                                                              |
|----------------------------------------------|--------------------------------------------------------------------------------------------------------------------------------------------------------------------------------------------------------------------------------------------------------------------------------------------------------------------------------------------------------------------------------------------------------------------------------------------------------------------------------------------------------------------------------------------------------------------------------------------------------------------------------------------------------------------------------------------------------------------------------------------------------------------------------------------------------------------------------------|
| <b>Preventable hospitalisations</b>          |                                                                                                                                                                                                                                                                                                                                                                                                                                                                                                                                                                                                                                                                                                                                                                                                                                      |
| Angina                                       | I20, I24.0, I24.8, I24.9 as principal diagnosis only, exclude cases with procedure codes not in blocks [1820] to [2016]                                                                                                                                                                                                                                                                                                                                                                                                                                                                                                                                                                                                                                                                                                              |
| Asthma                                       | J45, J46 as principal diagnosis only                                                                                                                                                                                                                                                                                                                                                                                                                                                                                                                                                                                                                                                                                                                                                                                                 |
| Chronic obstructive pulmonary disease (COPD) | J20, J41, J42, J43, J44, J47 as principal diagnosis only, J20 only with additional diagnoses of J41, J42, J43, J44, J47                                                                                                                                                                                                                                                                                                                                                                                                                                                                                                                                                                                                                                                                                                              |
| Congestive cardiac failure                   | I50, I11.0, J81 as principal diagnosis only, exclude cases with the following procedure codes: 33172-00, 35304-00, 35305-00, 35310-02, 35310-00, 38281-11, 38281-07, 38278-01, 38278-00, 38281-02, 38281-01, 38281-00, 38256-00, 38278-03, 38284-00, 38284-02, 38521-09, 38270-01, 38456-19, 38456-15, 38456-12, 38456-11, 38456-10, 38456-07, 38456-01, 38470-00, 38475-00, 38480-02, 38480-01, 38480-00, 38488-06, 38488-04, 38489-04, 38488-02, 38489-03, 38487-00, 38489-02, 38488-00, 38489-00, 38490-00, 38493-00, 38497-04, 38497-03, 38497-02, 38497-01, 38497-00, 38500-00, 38503-00, 38505-00, 38521-04, 38606-00, 38612-00, 38615-00, 38653-00, 38700-02, 38700-00, 38739-00, 38742-02, 38742-00, 38745-00, 38751-02, 38751-00, 38757-02, 38757-01, 38757-00, 90204-00, 90205-00, 90219-00, 90224-00, 90214-00, 90214-02. |
| Diabetes complications                       | E10–E14.9 as principal diagnoses, and E10–E14.9 as additional diagnoses where the principal diagnosis was: hypersmolarity (E87.0), acidosis (E87.2), transient ischaemic attack (G45), nerve disorders and neuropathies (G50–G64), cataracts and lens disorders (H25–H28), retinal disorders (H30–H36), glaucoma (H40–H42), myocardial infarction (I21–I22), other coronary heart diseases (I20, I23–I25), heart failure (I50), stroke and sequelae (I60–I64, I69.0–I69.4), peripheral vascular disease (I70–I74), gingivitis and periodontal disease (K05), kidney diseases including end-stage renal disease (N00–N29), and renal dialysis (Z49)                                                                                                                                                                                   |
| Hypertension                                 | I10, I11.9 as principal diagnosis only, exclude cases with procedure codes according to the list of procedures excluded from the Congestive cardiac failure category above.                                                                                                                                                                                                                                                                                                                                                                                                                                                                                                                                                                                                                                                          |
| Iron deficiency anaemia                      | D50.1, D50.8, D50.9 as principal diagnosis only.                                                                                                                                                                                                                                                                                                                                                                                                                                                                                                                                                                                                                                                                                                                                                                                     |
| Nutritional deficiencies                     | E40, E41, E42, E43, E55.0, E64.3 as principal diagnosis only.                                                                                                                                                                                                                                                                                                                                                                                                                                                                                                                                                                                                                                                                                                                                                                        |
| Rheumatic heart disease                      | I00 to I09 as principal diagnosis only. (Note: includes acute rheumatic fever)                                                                                                                                                                                                                                                                                                                                                                                                                                                                                                                                                                                                                                                                                                                                                       |
| Appendicitis with generalised peritonitis    | K35.0 in any diagnosis field                                                                                                                                                                                                                                                                                                                                                                                                                                                                                                                                                                                                                                                                                                                                                                                                         |
| Cellulitis                                   | L03, L04, L08, L88, L98.0, L98.3 as principal diagnosis only, exclude cases with any procedure except those in blocks 1820 to 2016 or if procedure is 30216-02, 30676-00, 30223-02, 30064-00, 34527-01, 34527-00, 90661-00 and this is the only listed procedure                                                                                                                                                                                                                                                                                                                                                                                                                                                                                                                                                                     |
| Convulsions and epilepsy                     | G40, G41, O15, R56 as principal diagnosis only                                                                                                                                                                                                                                                                                                                                                                                                                                                                                                                                                                                                                                                                                                                                                                                       |
| Dehydration and gastroenteritis              | A09.9, E86, K52.2, K52.8, K52.9 as principal diagnosis only.                                                                                                                                                                                                                                                                                                                                                                                                                                                                                                                                                                                                                                                                                                                                                                         |
| Dental conditions                            | K02, K03, K04, K05, K06, K08, K09.8, K09.9, K12, K13 as principal diagnosis only.                                                                                                                                                                                                                                                                                                                                                                                                                                                                                                                                                                                                                                                                                                                                                    |
| Ear, nose and throat infections              | H66, H67, J02, J03, J06, J31.2 as principal diagnosis only.                                                                                                                                                                                                                                                                                                                                                                                                                                                                                                                                                                                                                                                                                                                                                                          |
| Gangrene                                     | R02 in any diagnosis field                                                                                                                                                                                                                                                                                                                                                                                                                                                                                                                                                                                                                                                                                                                                                                                                           |
| Pelvic inflammatory disease                  | N70, N73, N74 as principal diagnosis only.                                                                                                                                                                                                                                                                                                                                                                                                                                                                                                                                                                                                                                                                                                                                                                                           |
| Perforated/bleeding ulcer                    | K25.0, K25.1, K25.2, K25.4, K25.5, K25.6, K26.0, K26.1, K26.2, K26.4, K26.5, K26.6, K27.0, K27.1, K27.2, K27.4, K27.5, K27.6, K28.0, K28.1, K28.2, K28.4, K28.5, K28.6 as principal diagnosis only.                                                                                                                                                                                                                                                                                                                                                                                                                                                                                                                                                                                                                                  |
| Pyelonephritis                               | N10, N11, N12, N13.6, N39.0 as principal diagnosis only.                                                                                                                                                                                                                                                                                                                                                                                                                                                                                                                                                                                                                                                                                                                                                                             |
| Influenza and pneumonia                      | J10, J11, J13, J14, J15.3, J15.4, J15.7, J15.9, J16.8, J18.1, J18.8 in any diagnosis field, excludes cases with additional diagnosis of D57 (sickle-cell disorders) and people under 2 months                                                                                                                                                                                                                                                                                                                                                                                                                                                                                                                                                                                                                                        |
| Other vaccine-preventable conditions         | A35, A36, A37, A80, B05, B06, B16.1, B16.9, B18.0, B18.1, B26, G00.0, M01.4 in any diagnosis field                                                                                                                                                                                                                                                                                                                                                                                                                                                                                                                                                                                                                                                                                                                                   |
| Acute myocardial infarction (AMI)            | I21                                                                                                                                                                                                                                                                                                                                                                                                                                                                                                                                                                                                                                                                                                                                                                                                                                  |
| Hip fracture                                 | S72.0, S72.1, S72.2                                                                                                                                                                                                                                                                                                                                                                                                                                                                                                                                                                                                                                                                                                                                                                                                                  |

## Appendix 2:

Hospital categories, corresponding peer groups from the *NSW Health Services Comparison Data Book 2008/2009*, and number all cause admissions during follow-up.

| Hospital Peer Group                 | Description                                                                                                                                                                                                                                                                                                                                                    | Admissions |
|-------------------------------------|----------------------------------------------------------------------------------------------------------------------------------------------------------------------------------------------------------------------------------------------------------------------------------------------------------------------------------------------------------------|------------|
| <b>Principal</b>                    |                                                                                                                                                                                                                                                                                                                                                                |            |
| A1a Principal Referral Group A      | Acute hospitals, treating 25,000 or more acute casemix weighted separations per annum, with an average cost weight greater than 1 and having more than 1 specialty service.                                                                                                                                                                                    | 76,193     |
| A1b Principal Referral Group B      | Acute hospitals, treating 25,000 or more acute casemix weighted separations per annum, with an average cost weight greater than 1 and 1 or fewer specialty services.                                                                                                                                                                                           | 28,424     |
| A2 Paediatric Specialist            | Establishments where the primary role is to provide specialist acute care services for children.                                                                                                                                                                                                                                                               | -          |
| A3 Ungrouped Acute                  | Establishments whose primary role is the provision of acute services of a specialised nature for which there is insufficient peers to form additional peer groups.                                                                                                                                                                                             | 6,284      |
| <b>Major metropolitan</b>           |                                                                                                                                                                                                                                                                                                                                                                |            |
| B1 Major Metropolitan:              | Acute hospitals, treating 10,000 or more acute casemix weighted separations per annum, but having less than 25,000 acute casemix weighted separations or an average casemix weight of less than 1.                                                                                                                                                             | 30,512     |
| <b>Major non-metropolitan</b>       |                                                                                                                                                                                                                                                                                                                                                                |            |
| B2 Major Non-Metropolitan:          | Acute hospitals treating 10,000 or more acute casemix weighted separations per annum that are located in rural areas providing acute specialist and referral services for a catchment population from a large geographical area.                                                                                                                               | 68,460     |
| <b>District</b>                     |                                                                                                                                                                                                                                                                                                                                                                |            |
| C1 District Group 1                 | Acute hospitals, treating 5,000 or more, but less than 10,000 acute casemix weighted separations per annum.                                                                                                                                                                                                                                                    | 27,671     |
| C2 District Group 2                 | Acute hospitals, treating 2,000 or more, but less than 5,000 acute casemix weighted separations per annum, plus acute hospitals treating less than 2,000 acute casemix weighted separations per annum but with more than 2,000 separations per annum.                                                                                                          | 29,470     |
| <b>Community</b>                    |                                                                                                                                                                                                                                                                                                                                                                |            |
| D1a Community Acute with Surgery    | Acute hospitals, treating less than 2,000 acute casemix weighted separations per annum, and less than 2,000 acute separations per annum, with less than 40% nonacute and outlier bed days of total bed days and greater than 2% of their acute weighted separations being surgical.                                                                            | 6,352      |
| D1b Community Acute without Surgery | Acute hospitals, treating less than 2,000 acute casemix weighted separations per annum, and less than 2,000 acute separations per annum, with less than 40% nonacute and outlier bed days of total bed days, and less than 2% of their acute weighted separations being surgical.                                                                              | 3,620      |
| D2 Community Non-Acute              | Non-acute hospitals, treating less than 2,000 acute casemix weighted separations per annum, and less than 2,000 acute separations per annum, with more than 40% nonacute and outlier bed days of total bed days.                                                                                                                                               | 3,061      |
| <b>Multi-purpose</b>                |                                                                                                                                                                                                                                                                                                                                                                |            |
| F1 Psychiatric                      | Establishments devoted primarily to the treatment and care of inpatients with psychiatric, mental or behavioural disorders. Centres of non-acute treatment of drug dependence, developmental and intellectual disability are not included here. This group also excludes institutions mainly providing living quarters or day care.                            | 195        |
| F2 Nursing Homes                    | Establishments which provide long-term care involving regular base nursing care to chronically ill, frail, disabled or convalescent persons or senile inpatients. They must be approved by the Commonwealth Department of Health and Family Services and /or licensed by the State, or controlled by government departments.                                   | 184        |
| F3 Multi-Purpose Services           | Multi-Purpose Services (MPSs) which provide integrated acute health, nursing home, hostel, community health and aged care services under one organisational structure, as agreed between the Commonwealth and State Governments. MPSs provide a range of services which are negotiated with the community, the service providers and the relevant Departments. | 4,493      |
| F4 Sub Acute                        | Establishments that primarily provide sub-acute services, but are not specialist palliative care or specialist rehabilitation establishments.                                                                                                                                                                                                                  | 2,588      |
| F5 Palliative Care                  | Establishments with a specific function of providing palliative care to terminally ill patients.                                                                                                                                                                                                                                                               | 86         |
| F6 Rehabilitation                   | Establishments with a primary role in providing services to persons with an impairment, disability or handicap where the primary goal is improvement in functional status.                                                                                                                                                                                     | 34         |
| F7 Mothercraft                      | Establishments where the primary role is to help mothers acquire mothercraft skills in an inpatient setting.                                                                                                                                                                                                                                                   | 5          |
| F8 Ungrouped Non-Acute              | Establishments whose primary role is the provision of non-acute services, but for which there are insufficient peers to form an addition peer group. Limited comparisons can be made within this peer group and with other non-acute facilities.                                                                                                               | 328        |

### Appendix 3:

Incidence rate ratio (IRR) of patient-, area- and hospital-level factors from cross-classified multiple membership multilevel Poisson models on preventable hospitalisations and emergency admissions for acute myocardial infarction (AMI) and hip fracture

|                                | Preventable hospitalisation |               | AMI (emergency) |               | Hip fracture (emergency) |               |
|--------------------------------|-----------------------------|---------------|-----------------|---------------|--------------------------|---------------|
|                                | IRR                         | (95% CIs)     | IRR             | (95% CIs)     | IRR                      | (95% CIs)     |
| <b>Patient-level factors</b>   |                             |               |                 |               |                          |               |
| Age                            |                             |               |                 |               |                          |               |
| 45-54 years                    | 1.00                        | (ref)         | 1.00            | (ref)         | 1.00                     | (ref)         |
| 55-64 years                    | 1.23                        | (1.18 - 1.29) | 1.71            | (1.49 - 1.97) | 2.25                     | (1.52 - 3.33) |
| 65-74 years                    | 1.72                        | (1.64 - 1.81) | 2.39            | (2.05 - 2.80) | 7.12                     | (4.89 - 10.4) |
| 75-84 years                    | 2.57                        | (2.44 - 2.70) | 4.23            | (3.61 - 4.96) | 24.7                     | (17.1 - 35.7) |
| 85 years and over              | 3.40                        | (3.20 - 3.61) | 7.64            | (6.35 - 9.18) | 49.2                     | (33.7 - 71.6) |
| Sex                            |                             |               |                 |               |                          |               |
| Males                          | 1.00                        | (ref)         | 1.00            | (ref)         | 1.00                     | (ref)         |
| Females                        | 0.72                        | (0.70 - 0.74) | 0.42            | (0.39 - 0.46) | 1.36                     | (1.21 - 1.53) |
| Highest level of education     |                             |               |                 |               |                          |               |
| Did not complete high school   | 1.00                        | (ref)         | 1.00            | (ref)         | 1.00                     | (ref)         |
| High school or equivalent      | 0.93                        | (0.91 - 0.96) | 0.92            | (0.85 - 0.99) | 1.02                     | (0.91 - 1.15) |
| University or higher           | 0.86                        | (0.83 - 0.90) | 0.78            | (0.69 - 0.88) | 1.16                     | (0.98 - 1.38) |
| Unknown / missing              | 1.13                        | (1.07 - 1.20) | 0.95            | (0.77 - 1.16) | 0.90                     | (0.68 - 1.18) |
| Marital status                 |                             |               |                 |               |                          |               |
| Single                         | 1.00                        | (ref)         | 1.00            | (ref)         | 1.00                     | (ref)         |
| Married / partnered            | 1.19                        | (1.13 - 1.25) | 1.09            | (0.93 - 1.28) | 1.31                     | (1.05 - 1.63) |
| Widowed / divorced / separated | 1.17                        | (1.13 - 1.20) | 1.19            | (1.10 - 1.30) | 1.14                     | (1.01 - 1.28) |
| Unknown / missing              | 1.22                        | (1.08 - 1.37) | 0.79            | (0.50 - 1.25) | 0.57                     | (0.25 - 1.29) |
| Annual household income        |                             |               |                 |               |                          |               |
| <\$10,000                      | 1.00                        | (ref)         | 1.00            | (ref)         | 1.00                     | (ref)         |
| \$10,000 - \$29,999            | 0.89                        | (0.86 - 0.92) | 0.87            | (0.76 - 0.99) | 1.04                     | (0.87 - 1.25) |
| \$30,000 - \$49,000            | 0.80                        | (0.76 - 0.84) | 0.89            | (0.76 - 1.04) | 0.80                     | (0.62 - 1.02) |
| \$50,000 - \$69,999            | 0.75                        | (0.70 - 0.80) | 0.85            | (0.70 - 1.03) | 0.88                     | (0.63 - 1.21) |
| \$70,000 or more               | 0.65                        | (0.61 - 0.69) | 0.75            | (0.62 - 0.90) | 0.85                     | (0.63 - 1.16) |
| Not specified                  | 0.94                        | (0.90 - 0.98) | 1.04            | (0.90 - 1.20) | 1.05                     | (0.86 - 1.28) |
| Unknown / missing              | 1.13                        | (1.07 - 1.18) | 1.14            | (0.97 - 1.34) | 1.15                     | (0.93 - 1.43) |
| Employment status              |                             |               |                 |               |                          |               |
| Not working                    | 1.00                        | (ref)         | 1.00            | (ref)         | 1.00                     | (ref)         |
| Part time                      | 0.82                        | (0.79 - 0.86) | 0.90            | (0.78 - 1.04) | 0.63                     | (0.47 - 0.84) |
| Full time                      | 0.84                        | (0.80 - 0.88) | 1.16            | (1.01 - 1.33) | 0.90                     | (0.67 - 1.19) |
| Missing / unknown              | 0.93                        | (0.85 - 1.01) | 1.03            | (0.78 - 1.38) | 0.91                     | (0.64 - 1.28) |
| Language spoken at home        |                             |               |                 |               |                          |               |
| English                        | 1.00                        | (ref)         | 1.00            | (ref)         | 1.00                     | (ref)         |
| Other                          | 0.92                        | (0.88 - 0.96) | 0.99            | (0.87 - 1.12) | 1.04                     | (0.88 - 1.23) |
| Health insurance status        |                             |               |                 |               |                          |               |
| Private with extras            | 1.00                        | (ref)         | 1.00            | (ref)         | 1.00                     | (ref)         |
| Private, no extras             | 1.03                        | (0.99 - 1.08) | 1.05            | (0.93 - 1.18) | 0.93                     | (0.79 - 1.09) |
| Department of Veterans Affairs | 1.28                        | (1.21 - 1.36) | 1.08            | (0.91 - 1.28) | 1.11                     | (0.91 - 1.35) |
| Health Care Card               | 1.60                        | (1.54 - 1.65) | 1.42            | (1.29 - 1.57) | 0.94                     | (0.82 - 1.08) |

|                                                 | Preventable hospitalisation |               | AMI (emergency) |               | Hip fracture (emergency) |               |
|-------------------------------------------------|-----------------------------|---------------|-----------------|---------------|--------------------------|---------------|
|                                                 | IRR                         | (95% CIs)     | IRR             | (95% CIs)     | IRR                      | (95% CIs)     |
| None                                            | 1.50                        | (1.44 - 1.55) | 1.26            | (1.13 - 1.41) | 0.93                     | (0.78 - 1.10) |
| Number of people can depend on                  |                             |               |                 |               |                          |               |
| 0 people                                        | 1.00                        | (ref)         | 1.00            | (ref)         | 1.00                     | (ref)         |
| 1-4 people                                      | 1.09                        | (1.04 - 1.14) | 0.92            | (0.80 - 1.06) | 1.20                     | (0.96 - 1.49) |
| 5-10 people                                     | 1.07                        | (1.02 - 1.12) | 0.92            | (0.80 - 1.07) | 1.18                     | (0.94 - 1.47) |
| 11 or more people                               | 1.20                        | (1.14 - 1.27) | 0.89            | (0.75 - 1.06) | 1.15                     | (0.89 - 1.50) |
| Unknown / missing                               | 1.16                        | (1.10 - 1.24) | 0.99            | (0.82 - 1.20) | 1.35                     | (1.04 - 1.77) |
| Positive health seeking behaviours <sup>a</sup> |                             |               |                 |               |                          |               |
| 0 health behaviours                             | 0.96                        | (0.86 - 1.07) | 1.02            | (0.72 - 1.43) | 1.31                     | (0.77 - 2.23) |
| 1 health behaviour                              | 1.00                        | (ref)         | 1.00            | (ref)         | 1.00                     | (ref)         |
| 2 health behaviours                             | 0.89                        | (0.86 - 0.93) | 0.89            | (0.80 - 1.00) | 0.76                     | (0.65 - 0.89) |
| 3 health behaviours                             | 0.78                        | (0.75 - 0.81) | 0.76            | (0.68 - 0.85) | 0.65                     | (0.55 - 0.77) |
| 4 health behaviours                             | 0.76                        | (0.72 - 0.80) | 0.75            | (0.64 - 0.88) | 0.55                     | (0.43 - 0.70) |
| BMI                                             |                             |               |                 |               |                          |               |
| Underweight                                     | 1.13                        | (1.08 - 1.17) | 1.01            | (0.88 - 1.15) | 1.10                     | (0.96 - 1.27) |
| Healthy weight                                  | 1.00                        | (ref)         | 1.00            | (ref)         | 1.00                     | (ref)         |
| Overweight                                      | 0.94                        | (0.91 - 0.97) | 0.95            | (0.87 - 1.03) | 0.57                     | (0.50 - 0.64) |
| Obese                                           | 1.00                        | (0.96 - 1.03) | 1.00            | (0.90 - 1.10) | 0.35                     | (0.29 - 0.42) |
| Unknown / missing                               | 1.20                        | (1.10 - 1.32) | 1.10            | (0.80 - 1.50) | 0.69                     | (0.41 - 1.16) |
| Self-rated health                               |                             |               |                 |               |                          |               |
| Excellent                                       | 1.00                        | (ref)         | 1.00            | (ref)         | 1.00                     | (ref)         |
| Very good                                       | 1.22                        | (1.13 - 1.30) | 1.21            | (1.03 - 1.43) | 0.86                     | (0.67 - 1.10) |
| Good                                            | 1.60                        | (1.50 - 1.71) | 1.32            | (1.12 - 1.55) | 1.04                     | (0.81 - 1.33) |
| Fair                                            | 2.58                        | (2.40 - 2.76) | 1.59            | (1.33 - 1.90) | 1.18                     | (0.91 - 1.54) |
| Poor                                            | 4.10                        | (3.79 - 4.43) | 1.84            | (1.47 - 2.32) | 1.66                     | (1.20 - 2.29) |
| Unknown / missing                               | 2.27                        | (2.09 - 2.46) | 1.37            | (1.09 - 1.72) | 1.04                     | (0.77 - 1.42) |
| Multi-morbid conditions <sup>b</sup>            |                             |               |                 |               |                          |               |
| No conditions                                   | 1.00                        | (ref)         | 1.00            | (ref)         | 1.00                     | (ref)         |
| 1 condition                                     | 1.35                        | (1.31 - 1.40) | 1.20            | (1.09 - 1.32) | 1.00                     | (0.87 - 1.14) |
| 2 conditions                                    | 1.98                        | (1.91 - 2.05) | 1.45            | (1.30 - 1.62) | 0.90                     | (0.77 - 1.05) |
| 3 or more conditions                            | 2.71                        | (2.60 - 2.82) | 2.26            | (2.01 - 2.55) | 1.06                     | (0.90 - 1.26) |
| Functional limitations <sup>c</sup>             |                             |               |                 |               |                          |               |
| No limitation                                   | 1.00                        | (ref)         | 1.00            | (ref)         | 1.00                     | (ref)         |
| Minor limitations                               | 1.04                        | (0.97 - 1.10) | 0.97            | (0.84 - 1.14) | 0.83                     | (0.60 - 1.16) |
| Mild limitation                                 | 1.25                        | (1.18 - 1.32) | 1.04            | (0.91 - 1.19) | 1.13                     | (0.86 - 1.48) |
| Moderate limitation                             | 1.56                        | (1.48 - 1.64) | 1.17            | (1.03 - 1.34) | 1.86                     | (1.45 - 2.38) |
| Severe limitation                               | 2.36                        | (2.24 - 2.48) | 1.49            | (1.30 - 1.71) | 2.83                     | (2.21 - 3.63) |
| Unknown / missing                               | 1.71                        | (1.61 - 1.80) | 1.24            | (1.07 - 1.44) | 1.75                     | (1.36 - 2.26) |
| Psychological distress <sup>d</sup>             |                             |               |                 |               |                          |               |
| Low distress                                    | 1.00                        | (ref)         | 1.00            | (ref)         | 1.00                     | (ref)         |
| Moderate distress                               | 1.03                        | (0.99 - 1.06) | 1.01            | (0.91 - 1.12) | 1.03                     | (0.88 - 1.20) |
| High distress                                   | 0.99                        | (0.95 - 1.03) | 1.08            | (0.92 - 1.26) | 1.10                     | (0.87 - 1.39) |
| Very high distress                              | 0.99                        | (0.94 - 1.06) | 0.88            | (0.69 - 1.12) | 1.18                     | (0.83 - 1.66) |
| Unknown / missing                               | 1.09                        | (1.03 - 1.15) | 1.31            | (1.12 - 1.54) | 1.16                     | (0.95 - 1.42) |
| <b>Area-level factors</b>                       |                             |               |                 |               |                          |               |
| Remoteness of residence                         |                             |               |                 |               |                          |               |

|                                          | Preventable hospitalisation |               | AMI (emergency) |               | Hip fracture (emergency) |               |
|------------------------------------------|-----------------------------|---------------|-----------------|---------------|--------------------------|---------------|
|                                          | IRR                         | (95% CIs)     | IRR             | (95% CIs)     | IRR                      | (95% CIs)     |
| Major city                               | 1.00                        | (ref)         | 1.00            | (ref)         | 1.00                     | (ref)         |
| Inner regional                           | 0.95                        | (0.88 - 1.02) | 1.05            | (0.91 - 1.22) | 1.13                     | (0.95 - 1.33) |
| Outer regional                           | 1.01                        | (0.88 - 1.15) | 1.08            | (0.87 - 1.34) | 1.06                     | (0.81 - 1.38) |
| Remote / very remote                     | 1.24                        | (0.97 - 1.58) | 0.95            | (0.61 - 1.48) | 0.84                     | (0.44 - 1.62) |
| <b>Full-time workload equivalent GPs</b> |                             |               |                 |               |                          |               |
| Quintile 1 (2.64-6.90 GPs)               | 1.00                        | (ref)         | 1.00            | (ref)         | 1.00                     | (ref)         |
| Quintile 2 (6.91-7.60 GPs)               | 0.89                        | (0.78 - 1.02) | 0.88            | (0.73 - 1.07) | 1.01                     | (0.80 - 1.29) |
| Quintile 3 (7.63-8.64 GPs)               | 0.95                        | (0.84 - 1.08) | 0.89            | (0.74 - 1.08) | 1.10                     | (0.87 - 1.39) |
| Quintile 4 (8.65-9.94 GPs)               | 0.92                        | (0.79 - 1.06) | 0.88            | (0.72 - 1.07) | 1.04                     | (0.82 - 1.32) |
| Quintile 5 (9.95-13.3 GPs)               | 1.02                        | (0.87 - 1.19) | 0.91            | (0.74 - 1.12) | 0.96                     | (0.74 - 1.23) |
| <b>Hospital-level factors</b>            |                             |               |                 |               |                          |               |
| <b>Hospital category</b>                 |                             |               |                 |               |                          |               |
| Principal                                | 1.00                        | (ref)         | 1.00            | (ref)         | 1.00                     | (ref)         |
| Major metropolitan                       | 0.99                        | (0.95 - 1.03) | 1.02            | (0.99 - 1.05) | 1.02                     | (0.99 - 1.05) |
| Major non-metropolitan                   | 1.01                        | (0.97 - 1.04) | 1.04            | (1.02 - 1.07) | 0.99                     | (0.96 - 1.02) |
| District                                 | 1.02                        | (0.99 - 1.06) | 1.00            | (0.97 - 1.03) | 0.99                     | (0.96 - 1.02) |
| Community                                | 1.06                        | (1.02 - 1.10) | 0.97            | (0.93 - 1.01) | 0.96                     | (0.91 - 1.01) |
| Multipurpose                             | 1.05                        | (1.01 - 1.09) | 0.93            | (0.88 - 0.99) | 1.02                     | (0.94 - 1.09) |
| <b>Random effects</b>                    |                             |               |                 |               |                          |               |
| <b>Residual random effect (SE)</b>       |                             |               |                 |               |                          |               |
| Hospital-level                           | 0.276                       | (0.056)       | 0.010           | (0.013)       | 0.024                    | (0.022)       |
| Area-level                               | 0.061                       | (0.011)       | 0.050           | (0.015)       | 0.013                    | (0.011)       |

<sup>a</sup> Healthy behaviours, of non-smoking status, safe level of alcohol consumption (<14 drinks per week), at least 2.5 hours of intensity-weighted physical activity per week, and meeting dietary guidelines for daily fruit (2 serves) and vegetable (5 serves) consumption

<sup>b</sup> Of self-reported heart disease, high blood pressure, stroke, diabetes, blood clot, asthma, Parkinson's disease, and any cancer except skin cancer.

<sup>c</sup> Measured using the Medical Outcome Study physical functioning scale.

<sup>d</sup> Measured using the K10 scale.
