# Supplementary material for: Do hospitals influence geographic variation in admission for preventable hospitalisation? A data linkage study in New South Wales, Australia
Source: PubMed Central journal article supplement (PMC6398792; doi:10.1136/bmjopen-2018-027639), 2019-02-22
Supplement: bmjopen-2018-027639supp001.pdf [file bmjopen-2018-027639supp001.pdf]

# Online appendices

## Appendix 1:

ICD-10-AM codes for identifying hospital outcomes.

| Category                                     | ICD-10-AM diagnosis and procedure codes                                                                                                                                                                                                                                                                                                                                                                                                                                                                                                                                                                                                                                                                                                                                                                                              |
|----------------------------------------------|--------------------------------------------------------------------------------------------------------------------------------------------------------------------------------------------------------------------------------------------------------------------------------------------------------------------------------------------------------------------------------------------------------------------------------------------------------------------------------------------------------------------------------------------------------------------------------------------------------------------------------------------------------------------------------------------------------------------------------------------------------------------------------------------------------------------------------------|
| <b>Preventable hospitalisations</b>          |                                                                                                                                                                                                                                                                                                                                                                                                                                                                                                                                                                                                                                                                                                                                                                                                                                      |
| Angina                                       | I20, I24.0, I24.8, I24.9 as principal diagnosis only, exclude cases with procedure codes not in blocks [1820] to [2016]                                                                                                                                                                                                                                                                                                                                                                                                                                                                                                                                                                                                                                                                                                              |
| Asthma                                       | J45, J46 as principal diagnosis only                                                                                                                                                                                                                                                                                                                                                                                                                                                                                                                                                                                                                                                                                                                                                                                                 |
| Chronic obstructive pulmonary disease (COPD) | J20, J41, J42, J43, J44, J47 as principal diagnosis only, J20 only with additional diagnoses of J41, J42, J43, J44, J47                                                                                                                                                                                                                                                                                                                                                                                                                                                                                                                                                                                                                                                                                                              |
| Congestive cardiac failure                   | I50, I11.0, J81 as principal diagnosis only, exclude cases with the following procedure codes: 33172-00, 35304-00, 35305-00, 35310-02, 35310-00, 38281-11, 38281-07, 38278-01, 38278-00, 38281-02, 38281-01, 38281-00, 38256-00, 38278-03, 38284-00, 38284-02, 38521-09, 38270-01, 38456-19, 38456-15, 38456-12, 38456-11, 38456-10, 38456-07, 38456-01, 38470-00, 38475-00, 38480-02, 38480-01, 38480-00, 38488-06, 38488-04, 38489-04, 38488-02, 38489-03, 38487-00, 38489-02, 38488-00, 38489-00, 38490-00, 38493-00, 38497-04, 38497-03, 38497-02, 38497-01, 38497-00, 38500-00, 38503-00, 38505-00, 38521-04, 38606-00, 38612-00, 38615-00, 38653-00, 38700-02, 38700-00, 38739-00, 38742-02, 38742-00, 38745-00, 38751-02, 38751-00, 38757-02, 38757-01, 38757-00, 90204-00, 90205-00, 90219-00, 90224-00, 90214-00, 90214-02. |
| Diabetes complications                       | E10–E14.9 as principal diagnoses, and E10–E14.9 as additional diagnoses where the principal diagnosis was: hypermolarity (E87.0), acidosis (E87.2), transient ischaemic attack (G45), nerve disorders and neuropathies (G50–G64), cataracts and lens disorders (H25–H28), retinal disorders (H30–H36), glaucoma (H40–H42), myocardial infarction (I21–I22), other coronary heart diseases (I20, I23–I25), heart failure (I50), stroke and sequelae (I60–I64, I69.0–I69.4), peripheral vascular disease (I70–I74), gingivitis and periodontal disease (K05), kidney diseases including end-stage renal disease (N00–N29), and renal dialysis (Z49)                                                                                                                                                                                    |
| Hypertension                                 | I10, I11.9 as principal diagnosis only, exclude cases with procedure codes according to the list of procedures excluded from the Congestive cardiac failure category above.                                                                                                                                                                                                                                                                                                                                                                                                                                                                                                                                                                                                                                                          |
| Iron deficiency anaemia                      | D50.1, D50.8, D50.9 as principal diagnosis only.                                                                                                                                                                                                                                                                                                                                                                                                                                                                                                                                                                                                                                                                                                                                                                                     |
| Nutritional deficiencies                     | E40, E41, E42, E43, E55.0, E64.3 as principal diagnosis only.                                                                                                                                                                                                                                                                                                                                                                                                                                                                                                                                                                                                                                                                                                                                                                        |
| Rheumatic heart disease                      | I00 to I09 as principal diagnosis only. (Note: includes acute rheumatic fever)                                                                                                                                                                                                                                                                                                                                                                                                                                                                                                                                                                                                                                                                                                                                                       |
| Appendicitis with generalised peritonitis    | K35.0 in any diagnosis field                                                                                                                                                                                                                                                                                                                                                                                                                                                                                                                                                                                                                                                                                                                                                                                                         |
| Cellulitis                                   | L03, L04, L08, L88, L98.0, L98.3 as principal diagnosis only, exclude cases with any procedure except those in blocks 1820 to 2016 or if procedure is 30216-02, 30676-00, 30223-02, 30064-00, 34527-01, 34527-00, 90661-00 and this is the only listed procedure                                                                                                                                                                                                                                                                                                                                                                                                                                                                                                                                                                     |
| Convulsions and epilepsy                     | G40, G41, O15, R56 as principal diagnosis only                                                                                                                                                                                                                                                                                                                                                                                                                                                                                                                                                                                                                                                                                                                                                                                       |
| Dehydration and gastroenteritis              | A09.9, E86, K52.2, K52.8, K52.9 as principal diagnosis only.                                                                                                                                                                                                                                                                                                                                                                                                                                                                                                                                                                                                                                                                                                                                                                         |
| Dental conditions                            | K02, K03, K04, K05, K06, K08, K09.8, K09.9, K12, K13 as principal diagnosis only.                                                                                                                                                                                                                                                                                                                                                                                                                                                                                                                                                                                                                                                                                                                                                    |
| Ear, nose and throat infections              | H66, H67, J02, J03, J06, J31.2 as principal diagnosis only.                                                                                                                                                                                                                                                                                                                                                                                                                                                                                                                                                                                                                                                                                                                                                                          |
| Gangrene                                     | R02 in any diagnosis field                                                                                                                                                                                                                                                                                                                                                                                                                                                                                                                                                                                                                                                                                                                                                                                                           |
| Pelvic inflammatory disease                  | N70, N73, N74 as principal diagnosis only.                                                                                                                                                                                                                                                                                                                                                                                                                                                                                                                                                                                                                                                                                                                                                                                           |
| Perforated/bleeding ulcer                    | K25.0, K25.1, K25.2, K25.4, K25.5, K25.6, K26.0, K26.1, K26.2, K26.4, K26.5, K26.6, K27.0, K27.1, K27.2, K27.4, K27.5, K27.6, K28.0, K28.1, K28.2, K28.4, K28.5, K28.6 as principal diagnosis only.                                                                                                                                                                                                                                                                                                                                                                                                                                                                                                                                                                                                                                  |
| Pyelonephritis                               | N10, N11, N12, N13.6, N39.0 as principal diagnosis only.                                                                                                                                                                                                                                                                                                                                                                                                                                                                                                                                                                                                                                                                                                                                                                             |
| Influenza and pneumonia                      | J10, J11, J13, J14, J15.3, J15.4, J15.7, J15.9, J16.8, J18.1, J18.8 in any diagnosis field, excludes cases with additional diagnosis of D57 (sickle-cell disorders) and people under 2 months                                                                                                                                                                                                                                                                                                                                                                                                                                                                                                                                                                                                                                        |
| Other vaccine-preventable conditions         | A35, A36, A37, A80, B05, B06, B16.1, B16.9, B18.0, B18.1, B26, G00.0, M01.4 in any diagnosis field                                                                                                                                                                                                                                                                                                                                                                                                                                                                                                                                                                                                                                                                                                                                   |
| Acute myocardial infarction (AMI)            | I21                                                                                                                                                                                                                                                                                                                                                                                                                                                                                                                                                                                                                                                                                                                                                                                                                                  |
| Hip fracture                                 | S72.0, S72.1, S72.2                                                                                                                                                                                                                                                                                                                                                                                                                                                                                                                                                                                                                                                                                                                                                                                                                  |

## Appendix 2:

Hospital categories, corresponding peer groups from the *NSW Health Services Comparison Data Book 2008/2009*, and number all cause admissions during follow-up.

| Hospital Peer Group                 | Description                                                                                                                                                                                                                                                                                                                                                    | Admissions |
|-------------------------------------|----------------------------------------------------------------------------------------------------------------------------------------------------------------------------------------------------------------------------------------------------------------------------------------------------------------------------------------------------------------|------------|
| <b>Principal</b>                    |                                                                                                                                                                                                                                                                                                                                                                |            |
| A1a Principal Referral Group A      | Acute hospitals, treating 25,000 or more acute casemix weighted separations per annum, with an average cost weight greater than 1 and having more than 1 specialty service.                                                                                                                                                                                    | 76,193     |
| A1b Principal Referral Group B      | Acute hospitals, treating 25,000 or more acute casemix weighted separations per annum, with an average cost weight greater than 1 and 1 or fewer specialty services.                                                                                                                                                                                           | 28,424     |
| A2 Paediatric Specialist            | Establishments where the primary role is to provide specialist acute care services for children.                                                                                                                                                                                                                                                               | -          |
| A3 Ungrouped Acute                  | Establishments whose primary role is the provision of acute services of a specialised nature for which there is insufficient peers to form additional peer groups.                                                                                                                                                                                             | 6,284      |
| <b>Major metropolitan</b>           |                                                                                                                                                                                                                                                                                                                                                                |            |
| B1 Major Metropolitan:              | Acute hospitals, treating 10,000 or more acute casemix weighted separations per annum, but having less than 25,000 acute casemix weighted separations or an average casemix weight of less than 1.                                                                                                                                                             | 30,512     |
| <b>Major non-metropolitan</b>       |                                                                                                                                                                                                                                                                                                                                                                |            |
| B2 Major Non-Metropolitan:          | Acute hospitals treating 10,000 or more acute casemix weighted separations per annum that are located in rural areas providing acute specialist and referral services for a catchment population from a large geographical area.                                                                                                                               | 68,460     |
| <b>District</b>                     |                                                                                                                                                                                                                                                                                                                                                                |            |
| C1 District Group 1                 | Acute hospitals, treating 5,000 or more, but less than 10,000 acute casemix weighted separations per annum.                                                                                                                                                                                                                                                    | 27,671     |
| C2 District Group 2                 | Acute hospitals, treating 2,000 or more, but less than 5,000 acute casemix weighted separations per annum, plus acute hospitals treating less than 2,000 acute casemix weighted separations per annum but with more than 2,000 separations per annum.                                                                                                          | 29,470     |
| <b>Community</b>                    |                                                                                                                                                                                                                                                                                                                                                                |            |
| D1a Community Acute with Surgery    | Acute hospitals, treating less than 2,000 acute casemix weighted separations per annum, and less than 2,000 acute separations per annum, with less than 40% nonacute and outlier bed days of total bed days and greater than 2% of their acute weighted separations being surgical.                                                                            | 6,352      |
| D1b Community Acute without Surgery | Acute hospitals, treating less than 2,000 acute casemix weighted separations per annum, and less than 2,000 acute separations per annum, with less than 40% nonacute and outlier bed days of total bed days, and less than 2% of their acute weighted separations being surgical.                                                                              | 3,620      |
| D2 Community Non-Acute              | Non-acute hospitals, treating less than 2,000 acute casemix weighted separations per annum, and less than 2,000 acute separations per annum, with more than 40% nonacute and outlier bed days of total bed days.                                                                                                                                               | 3,061      |
| <b>Multi-purpose</b>                |                                                                                                                                                                                                                                                                                                                                                                |            |
| F1 Psychiatric                      | Establishments devoted primarily to the treatment and care of inpatients with psychiatric, mental or behavioural disorders. Centres of non-acute treatment of drug dependence, developmental and intellectual disability are not included here. This group also excludes institutions mainly providing living quarters or day care.                            | 195        |
| F2 Nursing Homes                    | Establishments which provide long-term care involving regular base nursing care to chronically ill, frail, disabled or convalescent persons or senile inpatients. They must be approved by the Commonwealth Department of Health and Family Services and /or licensed by the State, or controlled by government departments.                                   | 184        |
| F3 Multi-Purpose Services           | Multi-Purpose Services (MPSs) which provide integrated acute health, nursing home, hostel, community health and aged care services under one organisational structure, as agreed between the Commonwealth and State Governments. MPSs provide a range of services which are negotiated with the community, the service providers and the relevant Departments. | 4,493      |
| F4 Sub Acute                        | Establishments that primarily provide sub-acute services, but are not specialist palliative care or specialist rehabilitation establishments.                                                                                                                                                                                                                  | 2,588      |
| F5 Palliative Care                  | Establishments with a specific function of providing palliative care to terminally ill patients.                                                                                                                                                                                                                                                               | 86         |
| F6 Rehabilitation                   | Establishments with a primary role in providing services to persons with an impairment, disability or handicap where the primary goal is improvement in functional status.                                                                                                                                                                                     | 34         |
| F7 Mothercraft                      | Establishments where the primary role is to help mothers acquire mothercraft skills in an inpatient setting.                                                                                                                                                                                                                                                   | 5          |
| F8 Ungrouped Non-Acute              | Establishments whose primary role is the provision of non-acute services, but for which there are insufficient peers to form an addition peer group. Limited comparisons can be made within this peer group and with other non-acute facilities.                                                                                                               | 328        |

### Appendix 3:

Incidence rate ratio (IRR) of patient-, area- and hospital-level factors from cross-classified multiple membership multilevel Poisson models on preventable hospitalisations and emergency admissions for acute myocardial infarction (AMI) and hip fracture

|                                | Preventable hospitalisation |               | AMI (emergency) |               | Hip fracture (emergency) |               |
|--------------------------------|-----------------------------|---------------|-----------------|---------------|--------------------------|---------------|
|                                | IRR                         | (95% CIs)     | IRR             | (95% CIs)     | IRR                      | (95% CIs)     |
| <b>Patient-level factors</b>   |                             |               |                 |               |                          |               |
| Age                            |                             |               |                 |               |                          |               |
| 45-54 years                    | 1.00                        | (ref)         | 1.00            | (ref)         | 1.00                     | (ref)         |
| 55-64 years                    | 1.23                        | (1.18 - 1.29) | 1.71            | (1.49 - 1.97) | 2.25                     | (1.52 - 3.33) |
| 65-74 years                    | 1.72                        | (1.64 - 1.81) | 2.39            | (2.05 - 2.80) | 7.12                     | (4.89 - 10.4) |
| 75-84 years                    | 2.57                        | (2.44 - 2.70) | 4.23            | (3.61 - 4.96) | 24.7                     | (17.1 - 35.7) |
| 85 years and over              | 3.40                        | (3.20 - 3.61) | 7.64            | (6.35 - 9.18) | 49.2                     | (33.7 - 71.6) |
| Sex                            |                             |               |                 |               |                          |               |
| Males                          | 1.00                        | (ref)         | 1.00            | (ref)         | 1.00                     | (ref)         |
| Females                        | 0.72                        | (0.70 - 0.74) | 0.42            | (0.39 - 0.46) | 1.36                     | (1.21 - 1.53) |
| Highest level of education     |                             |               |                 |               |                          |               |
| Did not complete high school   | 1.00                        | (ref)         | 1.00            | (ref)         | 1.00                     | (ref)         |
| High school or equivalent      | 0.93                        | (0.91 - 0.96) | 0.92            | (0.85 - 0.99) | 1.02                     | (0.91 - 1.15) |
| University or higher           | 0.86                        | (0.83 - 0.90) | 0.78            | (0.69 - 0.88) | 1.16                     | (0.98 - 1.38) |
| Unknown / missing              | 1.13                        | (1.07 - 1.20) | 0.95            | (0.77 - 1.16) | 0.90                     | (0.68 - 1.18) |
| Marital status                 |                             |               |                 |               |                          |               |
| Single                         | 1.00                        | (ref)         | 1.00            | (ref)         | 1.00                     | (ref)         |
| Married / partnered            | 1.19                        | (1.13 - 1.25) | 1.09            | (0.93 - 1.28) | 1.31                     | (1.05 - 1.63) |
| Widowed / divorced / separated | 1.17                        | (1.13 - 1.20) | 1.19            | (1.10 - 1.30) | 1.14                     | (1.01 - 1.28) |
| Unknown / missing              | 1.22                        | (1.08 - 1.37) | 0.79            | (0.50 - 1.25) | 0.57                     | (0.25 - 1.29) |
| Annual household income        |                             |               |                 |               |                          |               |
| <\$10,000                      | 1.00                        | (ref)         | 1.00            | (ref)         | 1.00                     | (ref)         |
| \$10,000 - \$29,999            | 0.89                        | (0.86 - 0.92) | 0.87            | (0.76 - 0.99) | 1.04                     | (0.87 - 1.25) |
| \$30,000 - \$49,000            | 0.80                        | (0.76 - 0.84) | 0.89            | (0.76 - 1.04) | 0.80                     | (0.62 - 1.02) |
| \$50,000 - \$69,999            | 0.75                        | (0.70 - 0.80) | 0.85            | (0.70 - 1.03) | 0.88                     | (0.63 - 1.21) |
| \$70,000 or more               | 0.65                        | (0.61 - 0.69) | 0.75            | (0.62 - 0.90) | 0.85                     | (0.63 - 1.16) |
| Not specified                  | 0.94                        | (0.90 - 0.98) | 1.04            | (0.90 - 1.20) | 1.05                     | (0.86 - 1.28) |
| Unknown / missing              | 1.13                        | (1.07 - 1.18) | 1.14            | (0.97 - 1.34) | 1.15                     | (0.93 - 1.43) |
| Employment status              |                             |               |                 |               |                          |               |
| Not working                    | 1.00                        | (ref)         | 1.00            | (ref)         | 1.00                     | (ref)         |
| Part time                      | 0.82                        | (0.79 - 0.86) | 0.90            | (0.78 - 1.04) | 0.63                     | (0.47 - 0.84) |
| Full time                      | 0.84                        | (0.80 - 0.88) | 1.16            | (1.01 - 1.33) | 0.90                     | (0.67 - 1.19) |
| Missing / unknown              | 0.93                        | (0.85 - 1.01) | 1.03            | (0.78 - 1.38) | 0.91                     | (0.64 - 1.28) |
| Language spoken at home        |                             |               |                 |               |                          |               |
| English                        | 1.00                        | (ref)         | 1.00            | (ref)         | 1.00                     | (ref)         |
| Other                          | 0.92                        | (0.88 - 0.96) | 0.99            | (0.87 - 1.12) | 1.04                     | (0.88 - 1.23) |
| Health insurance status        |                             |               |                 |               |                          |               |
| Private with extras            | 1.00                        | (ref)         | 1.00            | (ref)         | 1.00                     | (ref)         |
| Private, no extras             | 1.03                        | (0.99 - 1.08) | 1.05            | (0.93 - 1.18) | 0.93                     | (0.79 - 1.09) |
| Department of Veterans Affairs | 1.28                        | (1.21 - 1.36) | 1.08            | (0.91 - 1.28) | 1.11                     | (0.91 - 1.35) |
| Health Care Card               | 1.60                        | (1.54 - 1.65) | 1.42            | (1.29 - 1.57) | 0.94                     | (0.82 - 1.08) |

|                                                 | Preventable hospitalisation |               | AMI (emergency) |               | Hip fracture (emergency) |               |
|-------------------------------------------------|-----------------------------|---------------|-----------------|---------------|--------------------------|---------------|
|                                                 | IRR                         | (95% CIs)     | IRR             | (95% CIs)     | IRR                      | (95% CIs)     |
| None                                            | 1.50                        | (1.44 - 1.55) | 1.26            | (1.13 - 1.41) | 0.93                     | (0.78 - 1.10) |
| Number of people can depend on                  |                             |               |                 |               |                          |               |
| 0 people                                        | 1.00                        | (ref)         | 1.00            | (ref)         | 1.00                     | (ref)         |
| 1-4 people                                      | 1.09                        | (1.04 - 1.14) | 0.92            | (0.80 - 1.06) | 1.20                     | (0.96 - 1.49) |
| 5-10 people                                     | 1.07                        | (1.02 - 1.12) | 0.92            | (0.80 - 1.07) | 1.18                     | (0.94 - 1.47) |
| 11 or more people                               | 1.20                        | (1.14 - 1.27) | 0.89            | (0.75 - 1.06) | 1.15                     | (0.89 - 1.50) |
| Unknown / missing                               | 1.16                        | (1.10 - 1.24) | 0.99            | (0.82 - 1.20) | 1.35                     | (1.04 - 1.77) |
| Positive health seeking behaviours <sup>a</sup> |                             |               |                 |               |                          |               |
| 0 health behaviours                             | 0.96                        | (0.86 - 1.07) | 1.02            | (0.72 - 1.43) | 1.31                     | (0.77 - 2.23) |
| 1 health behaviour                              | 1.00                        | (ref)         | 1.00            | (ref)         | 1.00                     | (ref)         |
| 2 health behaviours                             | 0.89                        | (0.86 - 0.93) | 0.89            | (0.80 - 1.00) | 0.76                     | (0.65 - 0.89) |
| 3 health behaviours                             | 0.78                        | (0.75 - 0.81) | 0.76            | (0.68 - 0.85) | 0.65                     | (0.55 - 0.77) |
| 4 health behaviours                             | 0.76                        | (0.72 - 0.80) | 0.75            | (0.64 - 0.88) | 0.55                     | (0.43 - 0.70) |
| BMI                                             |                             |               |                 |               |                          |               |
| Underweight                                     | 1.13                        | (1.08 - 1.17) | 1.01            | (0.88 - 1.15) | 1.10                     | (0.96 - 1.27) |
| Healthy weight                                  | 1.00                        | (ref)         | 1.00            | (ref)         | 1.00                     | (ref)         |
| Overweight                                      | 0.94                        | (0.91 - 0.97) | 0.95            | (0.87 - 1.03) | 0.57                     | (0.50 - 0.64) |
| Obese                                           | 1.00                        | (0.96 - 1.03) | 1.00            | (0.90 - 1.10) | 0.35                     | (0.29 - 0.42) |
| Unknown / missing                               | 1.20                        | (1.10 - 1.32) | 1.10            | (0.80 - 1.50) | 0.69                     | (0.41 - 1.16) |
| Self-rated health                               |                             |               |                 |               |                          |               |
| Excellent                                       | 1.00                        | (ref)         | 1.00            | (ref)         | 1.00                     | (ref)         |
| Very good                                       | 1.22                        | (1.13 - 1.30) | 1.21            | (1.03 - 1.43) | 0.86                     | (0.67 - 1.10) |
| Good                                            | 1.60                        | (1.50 - 1.71) | 1.32            | (1.12 - 1.55) | 1.04                     | (0.81 - 1.33) |
| Fair                                            | 2.58                        | (2.40 - 2.76) | 1.59            | (1.33 - 1.90) | 1.18                     | (0.91 - 1.54) |
| Poor                                            | 4.10                        | (3.79 - 4.43) | 1.84            | (1.47 - 2.32) | 1.66                     | (1.20 - 2.29) |
| Unknown / missing                               | 2.27                        | (2.09 - 2.46) | 1.37            | (1.09 - 1.72) | 1.04                     | (0.77 - 1.42) |
| Multi-morbid conditions <sup>b</sup>            |                             |               |                 |               |                          |               |
| No conditions                                   | 1.00                        | (ref)         | 1.00            | (ref)         | 1.00                     | (ref)         |
| 1 condition                                     | 1.35                        | (1.31 - 1.40) | 1.20            | (1.09 - 1.32) | 1.00                     | (0.87 - 1.14) |
| 2 conditions                                    | 1.98                        | (1.91 - 2.05) | 1.45            | (1.30 - 1.62) | 0.90                     | (0.77 - 1.05) |
| 3 or more conditions                            | 2.71                        | (2.60 - 2.82) | 2.26            | (2.01 - 2.55) | 1.06                     | (0.90 - 1.26) |
| Functional limitations <sup>c</sup>             |                             |               |                 |               |                          |               |
| No limitation                                   | 1.00                        | (ref)         | 1.00            | (ref)         | 1.00                     | (ref)         |
| Minor limitations                               | 1.04                        | (0.97 - 1.10) | 0.97            | (0.84 - 1.14) | 0.83                     | (0.60 - 1.16) |
| Mild limitation                                 | 1.25                        | (1.18 - 1.32) | 1.04            | (0.91 - 1.19) | 1.13                     | (0.86 - 1.48) |
| Moderate limitation                             | 1.56                        | (1.48 - 1.64) | 1.17            | (1.03 - 1.34) | 1.86                     | (1.45 - 2.38) |
| Severe limitation                               | 2.36                        | (2.24 - 2.48) | 1.49            | (1.30 - 1.71) | 2.83                     | (2.21 - 3.63) |
| Unknown / missing                               | 1.71                        | (1.61 - 1.80) | 1.24            | (1.07 - 1.44) | 1.75                     | (1.36 - 2.26) |
| Psychological distress <sup>d</sup>             |                             |               |                 |               |                          |               |
| Low distress                                    | 1.00                        | (ref)         | 1.00            | (ref)         | 1.00                     | (ref)         |
| Moderate distress                               | 1.03                        | (0.99 - 1.06) | 1.01            | (0.91 - 1.12) | 1.03                     | (0.88 - 1.20) |
| High distress                                   | 0.99                        | (0.95 - 1.03) | 1.08            | (0.92 - 1.26) | 1.10                     | (0.87 - 1.39) |
| Very high distress                              | 0.99                        | (0.94 - 1.06) | 0.88            | (0.69 - 1.12) | 1.18                     | (0.83 - 1.66) |
| Unknown / missing                               | 1.09                        | (1.03 - 1.15) | 1.31            | (1.12 - 1.54) | 1.16                     | (0.95 - 1.42) |
| <b>Area-level factors</b>                       |                             |               |                 |               |                          |               |
| Remoteness of residence                         |                             |               |                 |               |                          |               |

|                                          | Preventable hospitalisation |               | AMI (emergency) |               | Hip fracture (emergency) |               |
|------------------------------------------|-----------------------------|---------------|-----------------|---------------|--------------------------|---------------|
|                                          | IRR                         | (95% CIs)     | IRR             | (95% CIs)     | IRR                      | (95% CIs)     |
| Major city                               | 1.00                        | (ref)         | 1.00            | (ref)         | 1.00                     | (ref)         |
| Inner regional                           | 0.95                        | (0.88 - 1.02) | 1.05            | (0.91 - 1.22) | 1.13                     | (0.95 - 1.33) |
| Outer regional                           | 1.01                        | (0.88 - 1.15) | 1.08            | (0.87 - 1.34) | 1.06                     | (0.81 - 1.38) |
| Remote / very remote                     | 1.24                        | (0.97 - 1.58) | 0.95            | (0.61 - 1.48) | 0.84                     | (0.44 - 1.62) |
| <b>Full-time workload equivalent GPs</b> |                             |               |                 |               |                          |               |
| Quintile 1 (2.64-6.90 GPs)               | 1.00                        | (ref)         | 1.00            | (ref)         | 1.00                     | (ref)         |
| Quintile 2 (6.91-7.60 GPs)               | 0.89                        | (0.78 - 1.02) | 0.88            | (0.73 - 1.07) | 1.01                     | (0.80 - 1.29) |
| Quintile 3 (7.63-8.64 GPs)               | 0.95                        | (0.84 - 1.08) | 0.89            | (0.74 - 1.08) | 1.10                     | (0.87 - 1.39) |
| Quintile 4 (8.65-9.94 GPs)               | 0.92                        | (0.79 - 1.06) | 0.88            | (0.72 - 1.07) | 1.04                     | (0.82 - 1.32) |
| Quintile 5 (9.95-13.3 GPs)               | 1.02                        | (0.87 - 1.19) | 0.91            | (0.74 - 1.12) | 0.96                     | (0.74 - 1.23) |
| <b>Hospital-level factors</b>            |                             |               |                 |               |                          |               |
| <b>Hospital category</b>                 |                             |               |                 |               |                          |               |
| Principal                                | 1.00                        | (ref)         | 1.00            | (ref)         | 1.00                     | (ref)         |
| Major metropolitan                       | 0.99                        | (0.95 - 1.03) | 1.02            | (0.99 - 1.05) | 1.02                     | (0.99 - 1.05) |
| Major non-metropolitan                   | 1.01                        | (0.97 - 1.04) | 1.04            | (1.02 - 1.07) | 0.99                     | (0.96 - 1.02) |
| District                                 | 1.02                        | (0.99 - 1.06) | 1.00            | (0.97 - 1.03) | 0.99                     | (0.96 - 1.02) |
| Community                                | 1.06                        | (1.02 - 1.10) | 0.97            | (0.93 - 1.01) | 0.96                     | (0.91 - 1.01) |
| Multipurpose                             | 1.05                        | (1.01 - 1.09) | 0.93            | (0.88 - 0.99) | 1.02                     | (0.94 - 1.09) |
| <b>Random effects</b>                    |                             |               |                 |               |                          |               |
| <b>Residual random effect (SE)</b>       |                             |               |                 |               |                          |               |
| Hospital-level                           | 0.276                       | (0.056)       | 0.010           | (0.013)       | 0.024                    | (0.022)       |
| Area-level                               | 0.061                       | (0.011)       | 0.050           | (0.015)       | 0.013                    | (0.011)       |

<sup>a</sup> Healthy behaviours, of non-smoking status, safe level of alcohol consumption (<14 drinks per week), at least 2.5 hours of intensity-weighted physical activity per week, and meeting dietary guidelines for daily fruit (2 serves) and vegetable (5 serves) consumption

<sup>b</sup> Of self-reported heart disease, high blood pressure, stroke, diabetes, blood clot, asthma, Parkinson's disease, and any cancer except skin cancer.

<sup>c</sup> Measured using the Medical Outcome Study physical functioning scale.

<sup>d</sup> Measured using the K10 scale.
